## The black goby *Gobius niger* Linnaeus, 1758 in the Marchica lagoon (Alboran Sea, Morocco): Ecological traits and site-related footprint

Amal Lamkhalkhal<sup>(1)(\*)</sup>, Mohamed Selfati<sup>(2)</sup>, Imane Rahmouni<sup>(1)</sup>, Nassir Kaddouri<sup>(1)</sup>, Bouabid Badaoui<sup>(1)</sup>, Antoine Pariselle<sup>(1,3)</sup>, Abdelaziz Benhoussa<sup>(1)</sup>, Nikol Kmentová<sup>(4)</sup>, Maarten P.M. Vanhove<sup>(4)</sup>, Hocein Bazairi<sup>(1,5)</sup>

<sup>(1)</sup> Mohammed V University in Rabat, Faculty of Sciences, Laboratory of Biodiversity, Ecology and Genome, 4 Avenue Ibn Battouta, B.P. 1014 RP, Rabat, Morocco

<sup>(2)</sup> Laboratoire Santé Et Environnement, Faculté des Sciences Ain Chock, Hassan II University of Casablanca, B.P 5366 Maarif, 20100 Casablanca, Morocco

<sup>(3)</sup> ISEM, CNRS, Université de Montpellier, IRD, Montpellier (France)

<sup>(4)</sup> Hasselt University, Centre for Environmental Sciences, Research Group Zoology: Biodiversity and Toxicology, Agoralaan Gebouw D - B-3590 Diepenbeek, Belgium

<sup>(5)</sup> Natural Sciences and Environment Research Hub, University of Gibraltar, Europa Point Campus, Gibraltar GX11 1AA

(\*) Corresponding author: [amal.lamkhalkhal@gmail.com](mailto:amal.lamkhalkhal@gmail.com)

### Abstract

Fish belonging to Gobiidae are well represented in the Marchica lagoon on the Moroccan Mediterranean coast, both in terms of species richness and abundance, with the black goby (*Gobius niger* Linnaeus, 1758) being the dominant species. The present study aims to examine (1) the ecological traits of *Gobius niger* and its environmental drivers in the lagoon and (2) the potential lagoon-related footprint using morphometric, genetic and parasitological proxies.

Systematic sampling covering the whole lagoon basin performed between October 2015 and November 2016 revealed year-long presence of *G. niger* throughout the lagoon with significantly low densities in winter. The higher abundances were recorded in the shallow bottoms of the lagoon inner margins on a variety of substrates (mud, muddy-sand, sandy-mud and fine sand) mostly covered by macroalgae and/or seagrass meadows. Multivariate analysis evidenced that depth and temperature were the important predictor variables explaining the spatial distribution of *G. niger* in the lagoon, with depth being the best model explaining about 33% of the total variability.

Comparison of black goby populations from the Marchica lagoon with their counterparts from the adjacent Mediterranean coast of Morocco revealed that specimens caught at the sea are of a bigger size compared to the ones from the lagoon without any effect of the colour morphs observed (dark vs clear). Of the 180 gobies investigated, not a single one hosted the parasites we targeted in the parasitological approach, monogenean flatworms. The absence of population structuring, low genetic diversity and presence of common haplotypes indicate no apparent restriction in the gene flow between the two populations. Moreover, the morphometric differences and colour morphs observed seems to be due to the external environment rather than genetic differences.

*Gobius niger* plays a key eco-trophic role by providing a link between benthic invertebrates and large predators. Therefore, ultimately, the shallow beds of the lagoon, where the species is abundant, are key habitats in the Marchica lagoon and need to be considered in all management plans aiming at the conservation of biodiversity and ecological processes.

**Key words:** Coastal lagoon, Mediterranean Sea, Gobiidae, Morphometry, Parasites, Genetics

## Introduction

Coastal lagoons are aquatic ecosystems at the terrestrial and marine interface, occupying approximately 13% of the world's coastline (Kjerfve, 1994). Due to the multiple ecosystem services they provide (Levin *et al.*, 2001) (e.g. shoreline protection, fisheries resources, nursery area, etc.), lagoons are considered as one of the most valuable coastal habitats on the planet (Pérez-Ruzafa *et al.*, 2019). However, combined natural and man-made stressors make them among the most heavily exploited and threatened natural systems worldwide (Eisenreich, 2005; Newton *et al.*, 2018).

Fish are highly valuable for their fundamental and demand-derived ecosystem services in coastal lagoons such as food supply and job creation (Holmlund & Hammer, 1999; Lopes & Videira, 2013; Newton *et al.*, 2014). In addition, they play a fundamental role in the ecological processes, through trophic relationships with other biotic components (Stein *et al.*, 1995; Vanni, 2002), and are essential for the functioning and resilience of lagoon ecosystems (Koutrakis *et al.*, 2005; Franco *et al.*, 2006; Aliaume *et al.*, 2007). Moreover, fish are relevant biotic indicators to survey biodiversity and ecological status (Whitfield & Elliott, 2002; Breine *et al.*, 2010). Therefore, reliable scientific data on the fish fauna and abiotic components of lagoon ecosystems are of particular importance for effective management (Vasconcelos & Galyean, 2007), ensuring the sustainability of ecosystem functions and services.

With 2,042 currently recognized species, Gobiidae forms the most species-rich family of fish, (Fricke *et al.*, 2021; Renoult *et al.*, 2022) and are found both in marine and freshwater environments (Renoult *et al.*, 2022). Generally, they are small and short-lived, and they live discreetly on the substrate or hidden in various types of cavities. Among them are benthic, hyperbenthic, cryptobenthic and nektonic species (Kovačić & Patzner, 2011). Despite their low commercial value, gobies play a crucial role as food resources for many commercially important species. They also have a crucial trophic function by linking benthic invertebrates to larger predatory fish (Casabianca & Kiener, 1969; Miller, 1979; Raffaelli *et al.*, 1989).

In the Mediterranean basin, 73 species of Gobiidae are known to occur currently (Kovačić, 2020, Goren & Stern, 2021; Iglésias *et al.*, 2021, Kovačić *et al.*, 2021). In the Mediterranean, 249 fish species were inventoried inhabiting estuaries and/or lagoons including both sedentary (euryvalent species, that live out their entire lifecycle inside lagoons and estuaries) and migratory (species that, after spending time in lagoons, are obliged to return to their native marine or river environment to complete their life cycle) fishes (Kara & Quignard, 2019). Besides, Gobiidae (at least 11 species) constitute with Syngnathidae (at least ten species), the most represented families of sedentary fish in Mediterranean lagoons (Kara & Quignard, 2019).

The Marchica lagoon (35.156944° / -2.845278°), situated on the Moroccan Mediterranean coast, is known to host a diverse fish fauna supporting important fishing activities (Selfati, 2020). Since the first inventory in 1911 (Oden, 1914), Gobiidae remains well represented in the Marchica lagoon, both qualitatively and quantitatively, with the black goby (*Gobius niger* Linnaeus, 1758) being the dominant species in the fish fauna (Selfati *et al.*, 2020). However, very little information exists on the ecological characteristics of this species, in particular its spatio-temporal structure in relation to the environmental factors.

Sedentary organisms, such as gobies, are the most suitable to be used as an indicator of lagoon environmental conditions (Bortone *et al.*, 2005). Their presence and abundance may provide important indications on the conservation status of coastal lagoon habitats (Facca *et al.*, 2020).

Assuming that the black goby *G. niger*, the most representative species of gobies in the Marchica lagoon, is considered as sedentary fish in coastal lagoons (Franco *et al.*, 2008a, 2008b, 2012; Kara & Quignard, 2019; Selfati *et al.*, 2019) and that the species has its counterparts along the adjacent Mediterranean coast of Morocco, our study aims to (1) establish the spatial and temporal distribution of *G. niger* and its environmental drivers using a systematic sampling covering the whole lagoon basin, and (2) examine the potential lagoon-related footprint *i.e.* whether the supposed sedentary population of the black goby in the Marchica lagoon differs from black gobies from the adjacent Mediterranean coast of Morocco considering morphometric, genetic and parasitological proxies.

## Materials and Methods

### *Study area*

The Marchica lagoon (Fig.1) ( $35.156944^{\circ}$  /  $-2.845278^{\circ}$ ), also called the lagoon of Nador, is one of the largest coastal lagoons in the Mediterranean (115 km<sup>2</sup>, 25 km long and 7.5 km wide) and the only one on the Mediterranean coast of Morocco (Selfati, 2020). The maximum depth is approximately 8m and the lagoon is separated from the Mediterranean Sea by a 25-km-long sandbar (Lido), with one artificial opening (300 m wide and 6 m deep) that allows water exchange. Despite its ecological (Site of Biological and Ecological Interest since 1996; RAMSAR site since 2005) and socio-economic (mainly artisanal fisheries) values, the lagoon is under pressure from a complex mixture of human-mediated stressors (urbanization, pollution, overfishing, tourism, and wastewater, among others) (Selfati *et al.*, 2017; El Kamcha *et al.*, 2020).

### *Sampling design and environmental data*

To examine the ecological traits of *G. niger* and their environmental drivers in the lagoon of Marchica, data on monthly abundances was extracted from a scientific monitoring of the fish fauna in the lagoon between October 2015 and November 2016. The monitoring was carried out according to an optimized network of 20 stations (S1-S20) covering the whole lagoon (Fig. 1). The fishing gear was a purse seine of about 110 m in length and 11 m in height, with a mesh size of 6 mm. The catches are expressed by units of effort corresponding to the surface sampled, equivalent to 800 m<sup>2</sup>. Environmental parameters were measured at each station. Water temperature (T) and salinity (S) were measured *in situ* using a conductivity meter “Cond 315i/SET”, and depth (D) was recorded using an LCD Digital Sounder (HONDEX PS-7). The water pH was measured in the laboratory from water samples collected in the field using a pH meter “IONOMETER-EUTECHINSTRUMENTS-CYBERSCAN-PH-510”. Other environmental variables were obtained from recently published literature (Mostarih *et al.*, 2016): dissolved oxygen (DO, as mg/l and percentage of saturation % O), suspended matter (SM, mg/l), suspended particulate inorganic matter (PIM, mg/l), and particulate organic matter (POM, mg/l).

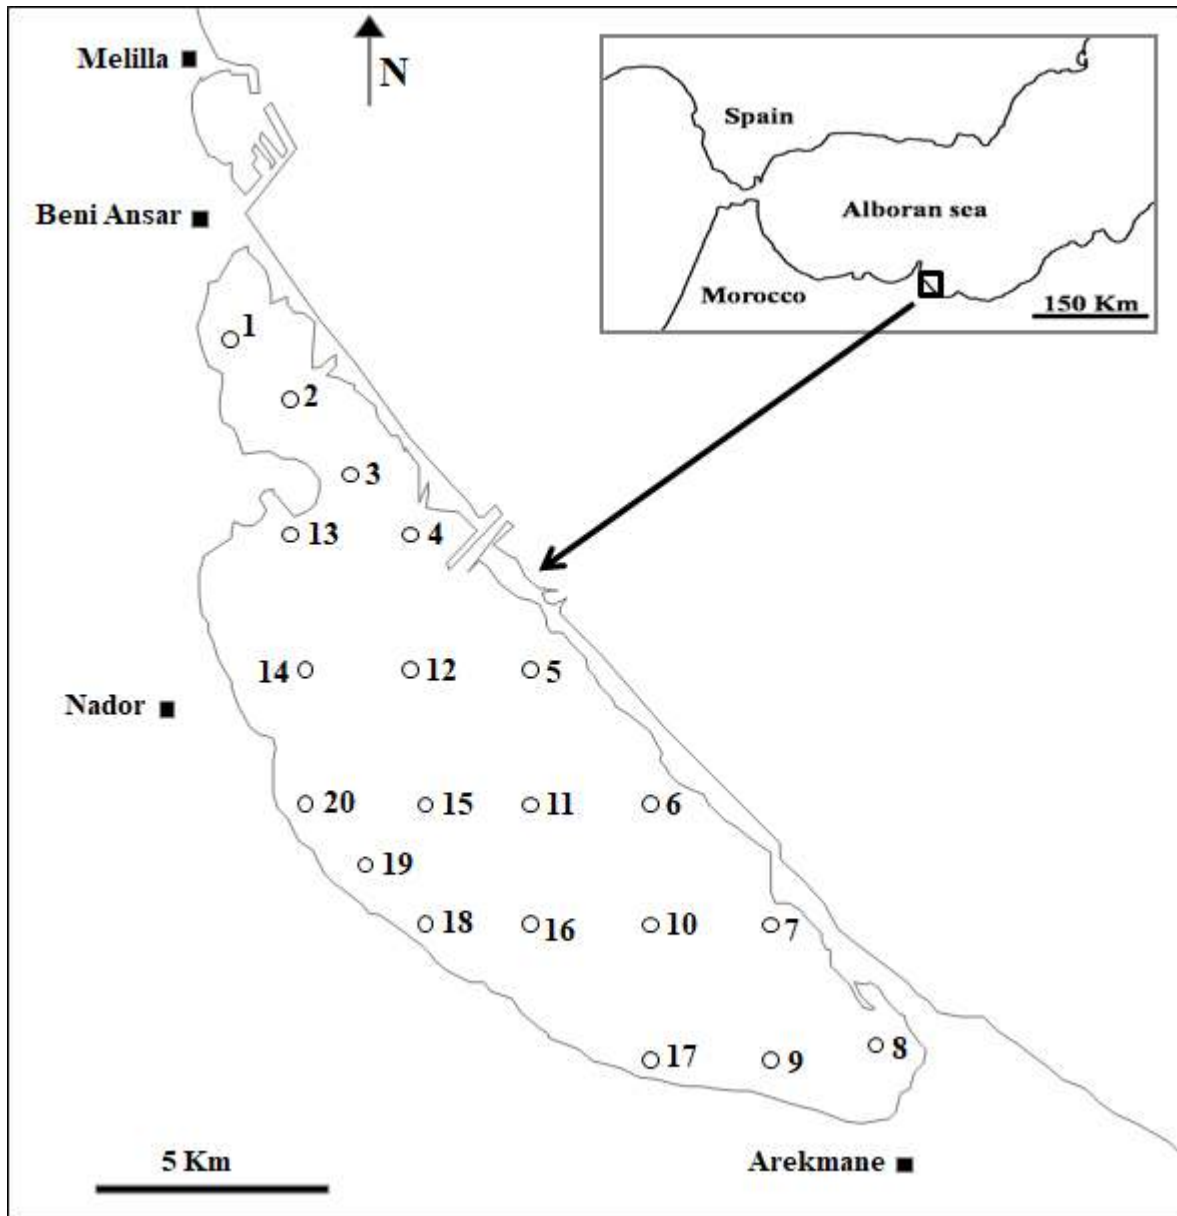

Fig. 1: Map showing the geographical localization of the Marchica lagoon and the sampling stations of *Gobius niger*.

In addition to the sampling described above, 120 black gobies from the Marchica lagoon and 60 ones from the adjacent Mediterranean coast of Morocco were collected as bycatch by fishing boats in July 2020. All the specimens were stored in separated plastic bags and were transported in a portable freezer (Engel MT45), then stored in the laboratory in a freezer (-20°C) for further study.

After thawing, the fish were numbered, labelled and photographed. A piece of the pectoral fin of each fish was taken and kept in an Eppendorf tube filled with 96% ethanol for molecular characterization.

Based on a colour pattern (clear vs dark), specimens of *G. niger* were separated, in the following analyses, into four groups: 'Lagoon clear' (specimens from the lagoon with clear colour), 'Lagoon dark' (specimens from the lagoon with dark colour), 'Sea clear' (specimens from the sea with clear colour) and 'Sea dark' specimens from the sea with dark colour).

### *Species identification*

Identification of fishes was performed based on a simple determination inspired by those provided by Brownell & Collignon (1978), Bauchot & Pras (1980) and Bauchot (1987) as well as the study of the lateral system. This is based on the positioning and arrangement of the mucous ducts and pores and the sensory papillae presented in two basic groupings of longitudinal and transverse series.

This species is characterized morphologically by: an elongated body; a slightly depressed head; the fourth ray of the first dorsal fin being more prolonged; very variable marbled coloration; a line of black dots often grouped by three, superimposed on a row of dark spots; a dark spot at the beginning of the first dorsal fin.

The number of rays at the pectoral fin varies from 15 to 18 rays, six rays (rarely five or seven) in the first dorsal and 11 to 15 soft rays on the second dorsal. The number of rays at the ventral fin varies between 9 and 11 rays; the number of rays at the anal fin varies from 11 to 13 rays.

### *Data collection and processing*

#### Ecological traits and environmental drivers

Spatial and temporal variations in abundance of *G. niger* (expressed as densities per 800 m<sup>2</sup>) were illustrated on maps using 11 classes of abundance based on the Sturges rule (Sturges, 1926). The spatial pattern of abundances (expressed as abundance per month and per station) of *G. niger* in the Marchica lagoon was explored, to identify affinity groups of stations, using a hierarchical cluster analysis, conducted on a transformed (four root) abundances similarity matrix based on the Euclidean distances. Then, the Analysis of similarities (ANOSIM) non-parametric test was performed to assess the level of significance of the groups of stations identified. Differences between sampling stations and seasons (winter: December, January and February; spring: March, April and May; summer: June, July and August; autumn: September, October and November) were tested with a two-way crossed PERMANOVA design.

Distance-based linear modelling (DISTLM) was performed to identify the key environmental drivers of the black goby's distribution pattern in the Marchica lagoon. The best overall model was selected using the BEST selection procedure with the Akaike Information Criterion (AIC) in order to reveal the significant variables influencing the observed patterns in spatial abundance (Akaike, 1973; Anderson *et al.*, 2008). A distance-based redundancy analysis (dbRDA, Legendre & Anderson, 1999; McArdle & Anderson, 2001) was used to illustrate graphically the results. The draftsman plots, and the associated correlation matrix between all pairs of variables, were examined for evidence of collinearity (Clarke *et al.*, 2014).

All the multivariate analyses were performed using the PRIMER 6 software (Clarke & Gorley, 2005).

#### Characterisation and comparison of goby populations

##### *Morphometric analysis*

Based on literature (Gaamour *et al.*, 2001), six morphometric characters were measured on each specimen to millimetre using a Vernier calliper: total length (TL), standard length (SL), head

length (HL), snout length (SnL), body height (BH) and eye diameter (ED). Moreover, five meristic characters were considered: Number of rays in the first dorsal fin (DF1), number of rays in the second dorsal fin (DF2), number of rays in the anal fin (AF), number of rays in the pectoral fin (PF) and number of rays in the ventral fin (VF) (Gaamour et al, 2001) (Fig. 2).

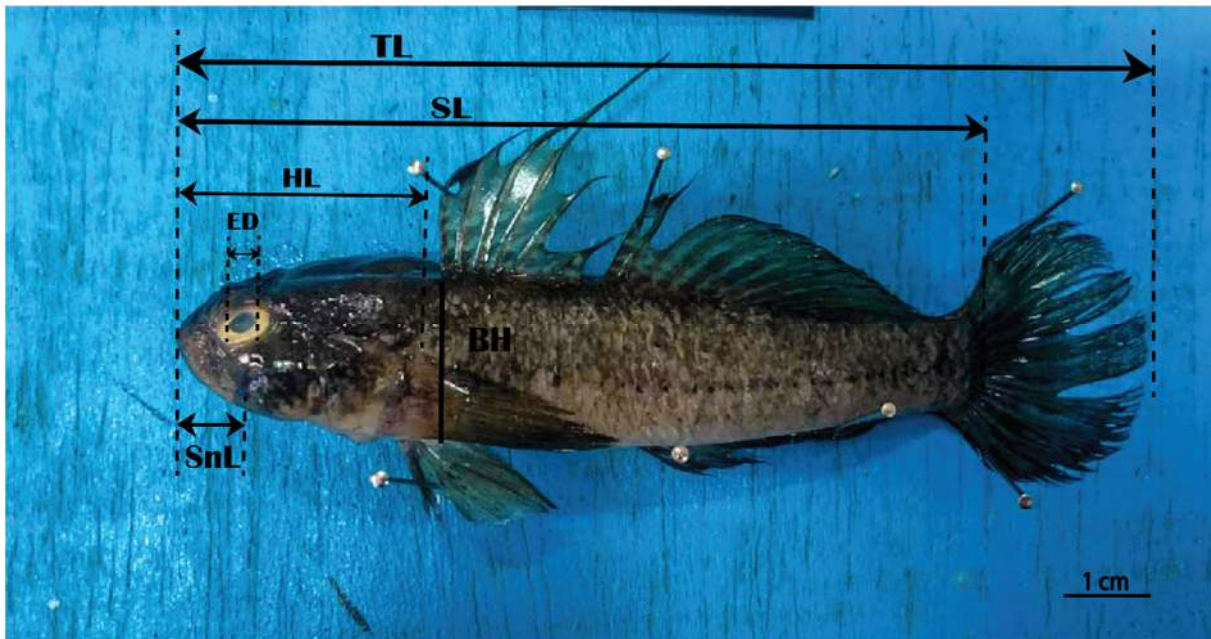

Fig. 2: Picture of a *Gobioides niger* showing the main measurements taken: total length (TL), standard length (SL), head length (LT), snout length (SnL), Body height (BH) and eye diameter (ED).

In order to see if there is a stratification based on origin and colour of *G. niger*, a first Principal Component Analysis (PCA) analysis was performed using morphometric characters, after a transformation ( $\log_{10}X+1$ ) of the raw measurements in order to linearize the allometries (Huxley, 1932) and to roughly equalize the variances (Jolicoeur, 1963).

An allometric correction was necessary to compare morphometries of series of specimens that differed in age and/or size structure. For this purpose, a linear regression was performed using standard length and principal components. A second PCA based on the residuals of this correlation was done to see if there is a correlation with size and a separation related to the geographic origin of the *G. niger* specimens.

All analyses were performed in the PAST v4.03 software (Hammer, Harper & Ryan, 2001).

### *Genetic differentiation*

DNA extraction of 120 specimens (30 Sea clear, 30 Sea dark, 30 Lagoon clear, 30 Lagoon dark) was performed according to the protocol of Aljanabi & Martinez (1997): approximately 50  $\mu\text{g}$  of pectoral fin fragment was digested at 55 °C overnight with 20  $\mu\text{l}$  of proteinase K (20 mg/ml) and 180  $\mu\text{l}$  of extraction buffer (0.4M NaCl, 1M Tris, 2 mM EDTA and 40  $\mu\text{l}$  of 20 % SDS). The extracted DNA was suspended in 150  $\mu\text{l}$  of sterile double-distilled water and stored at -20°C until amplification by PCR. We targeted a fragment of the 16S rRNA gene, since mitochondrial ribosomal sequences are well-represented in the genetic literature on Mediterranean and European gobies. As they capture interspecific and intraspecific diversity in these fishes, they can be considered potential barcoding markers (Vanhove *et al.*, 2012; 2016; 2022 and references therein). Amplification of the 16S rDNA gene was performed in a final volume of

20 µl containing: 1 µl of extracted DNA; 4 µl buffer (10× Standard Taq Reaction Buffer), 1 µl of 10 mM dNTPs, 0.8 µl of 10 µM forward primers 16SH (5'-CGCCTGTTTATCAAAAACAT-3'), 0.8 µl of 10 µM reverse primer 16SL 5'-CGCCTGTTTATCAAAAACAT-3') (Palumbi *et al.*, 1991), 0.4 µl (2 units) of *Taq* polymerase, 1 µl of genomic DNA and 12 of nuclease free water. Amplification reactions were performed in a gradient thermal cycler according to the following program: initial denaturation at 94°C for 3min followed by 40 cycles each with denaturation for 30 sec at 94°C; a hybridization for 30 secs at 55°C and an elongation phase for 1 min at 72°C and at the end a final elongation for 10 min at 72°C. The PCR products were checked on 1% agarose gel and sent to the National Center for Scientific and Technical Research (CNRST) in Rabat; then they were sequenced by a Genomix sequencer (MGX) using the same forward and reverse primers as for the PCR.

Each DNA sequence obtained in both directions was cleaned and checked in MEGA X (Molecular Evolutionary Genetics Analysis) (Kumar *et al.*, 2018) to assemble the corresponding consensus sequence. The obtained sequences were aligned with the CLUSTAL W algorithm (Thompson *et al.* 1994) and then each sequence was blasted (Altschul *et al.*, 1990) with the sequences available in NCBI GenBank to check for possible matches.

To make sure that all of our 16S sequences, both the recently Moroccan sequences, and those we include from other studies, cluster monophyletically, without representatives of other species, a phylogenetic tree was built including all other species of *Gobius* that are represented on GenBank by a targeted a fragment of the 16S rRNA gene (see Supplementary material Table S1). The phylogenetic tree was constructed with MEGA X using the Neighbor Joining algorithm and the Kimura 2-P substitution model with 1000 bootstrap replicates.

All sequences were confirmed to belong to *G. niger* (Supplementary material Figure S1) and hence were included in a maximum parsimony analysis in the software package FITCHI (Matschiner, 2016) in order to visualize the genealogical relationships across the geographical range of *G. niger*.

DNASP v6.12.03 (Rozas *et al.*, 2017) was used to calculate molecular diversity indices: number of segregating sites (K), number of haplotypes (H), haplotype diversity (h) and nucleotide diversity ( $\pi$ ). Moreover, Fu, Li's F and Tajima's neutrality tests were performed to check for possible selection or change in population demography. Pairwise  $F_{ST}$  values were calculated in ARLEQUIN v3.5 (Excoffier & Lischer, 2010) using 100 permutations to express the degree of genetic differentiation between individuals.

A matrix correlation analysis (Mantel test; Mantel, 1967) permuting a morphological distance matrix against a genetic distance matrix was performed using R v3.5 software package ape (Paradis *et al.*, 2004), running 1000 permutations.

### *Parasitological screening*

Each specimen was placed in plastic bags with tap water and then the bags were vigorously shaken to detach the parasites from the skin, then the external surface of skin, fins and the holding water were examined. Gill arches on the right side of each specimen were removed through ventral and dorsal section, placed in a petri dish, and rinsed with a rinsing bottle filled with tap water. Then water and gill arches were examined under a stereoscope (Wild M8).

## Results

### *Ecological traits of *Gobius niger* in the Marchica lagoon and environmental drivers*

The black goby was permanently present in the Marchica lagoon, both over space and time but with differential abundances (Fig. 3). Overall, the monthly abundance fluctuated between no individuals and a maximum of 643 individuals. The mean abundance ( $\pm$  SD) was 44.13 individuals per station ( $\pm$  88). PERMANOVA results showed significant differences in total abundance between seasons and stations. Interactions between the two factors were not significant (Pseudo F= 1.072, p (perm) < 0.05). A posteriori pairwise comparison revealed that the black goby was significantly less abundant in winter than in other seasons. Regarding the second factor, most of the significant differences concern the combinations formed by the peripheral and central stations.



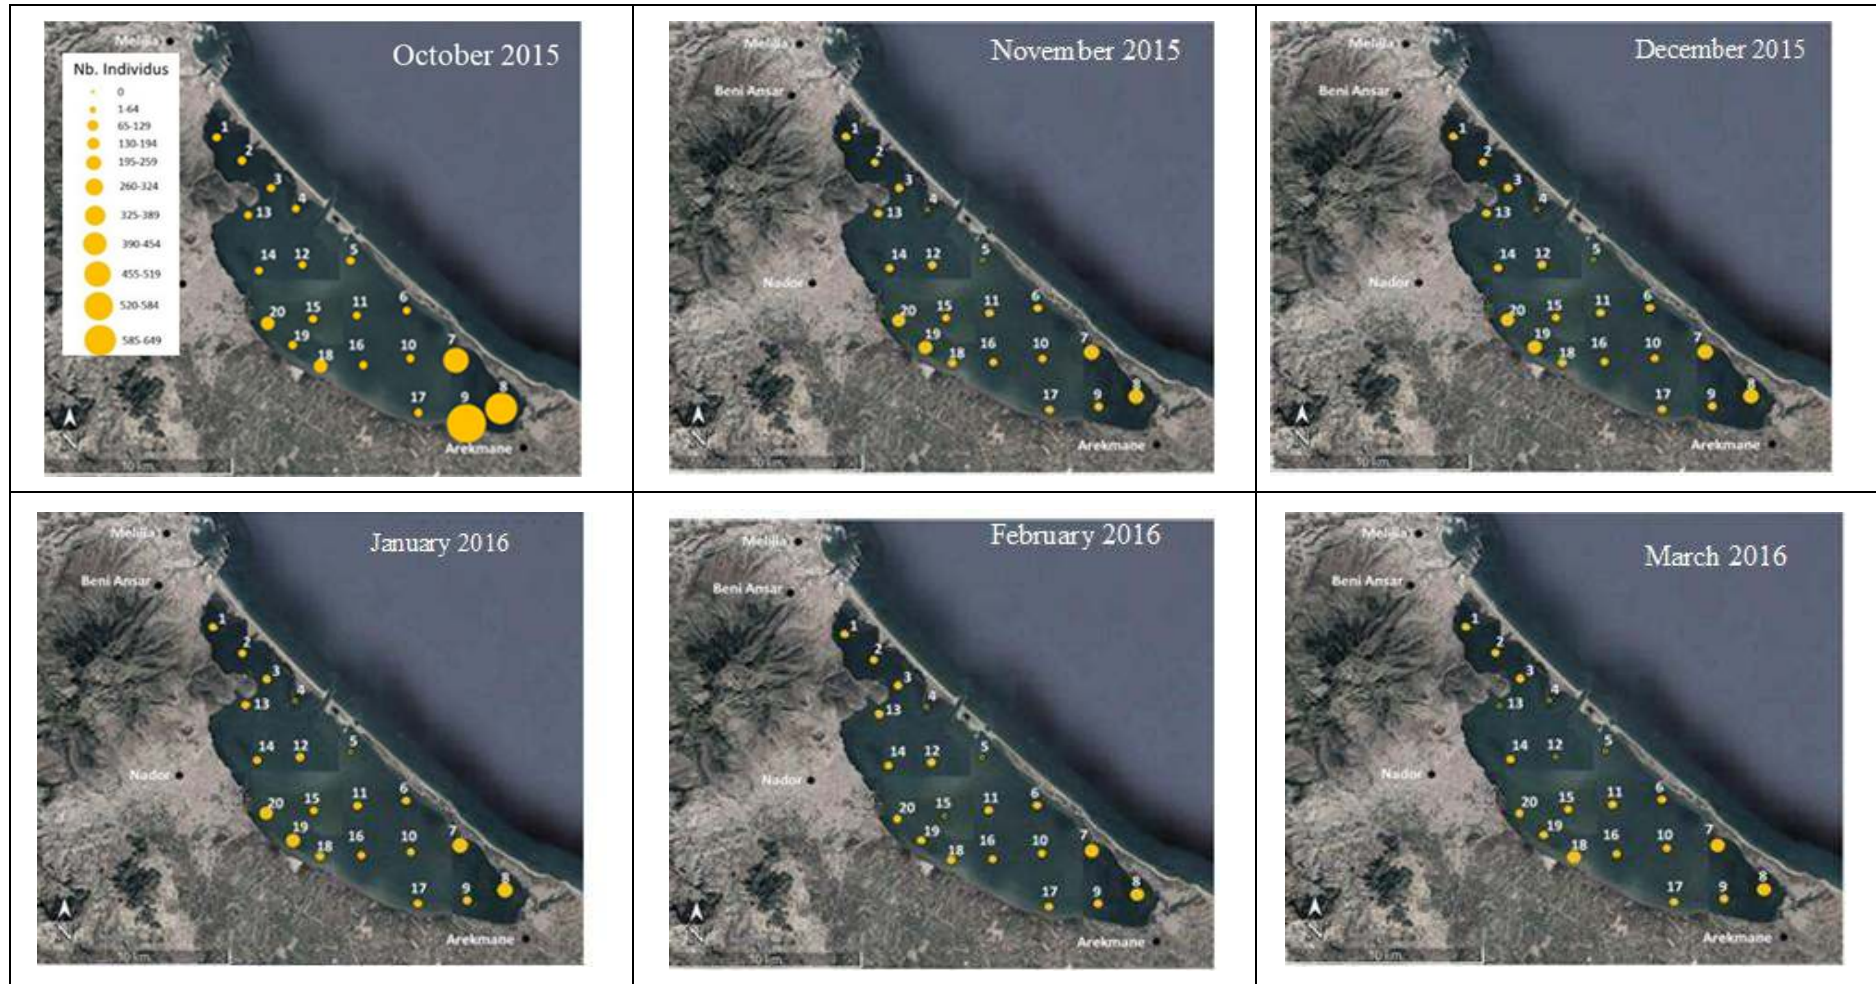

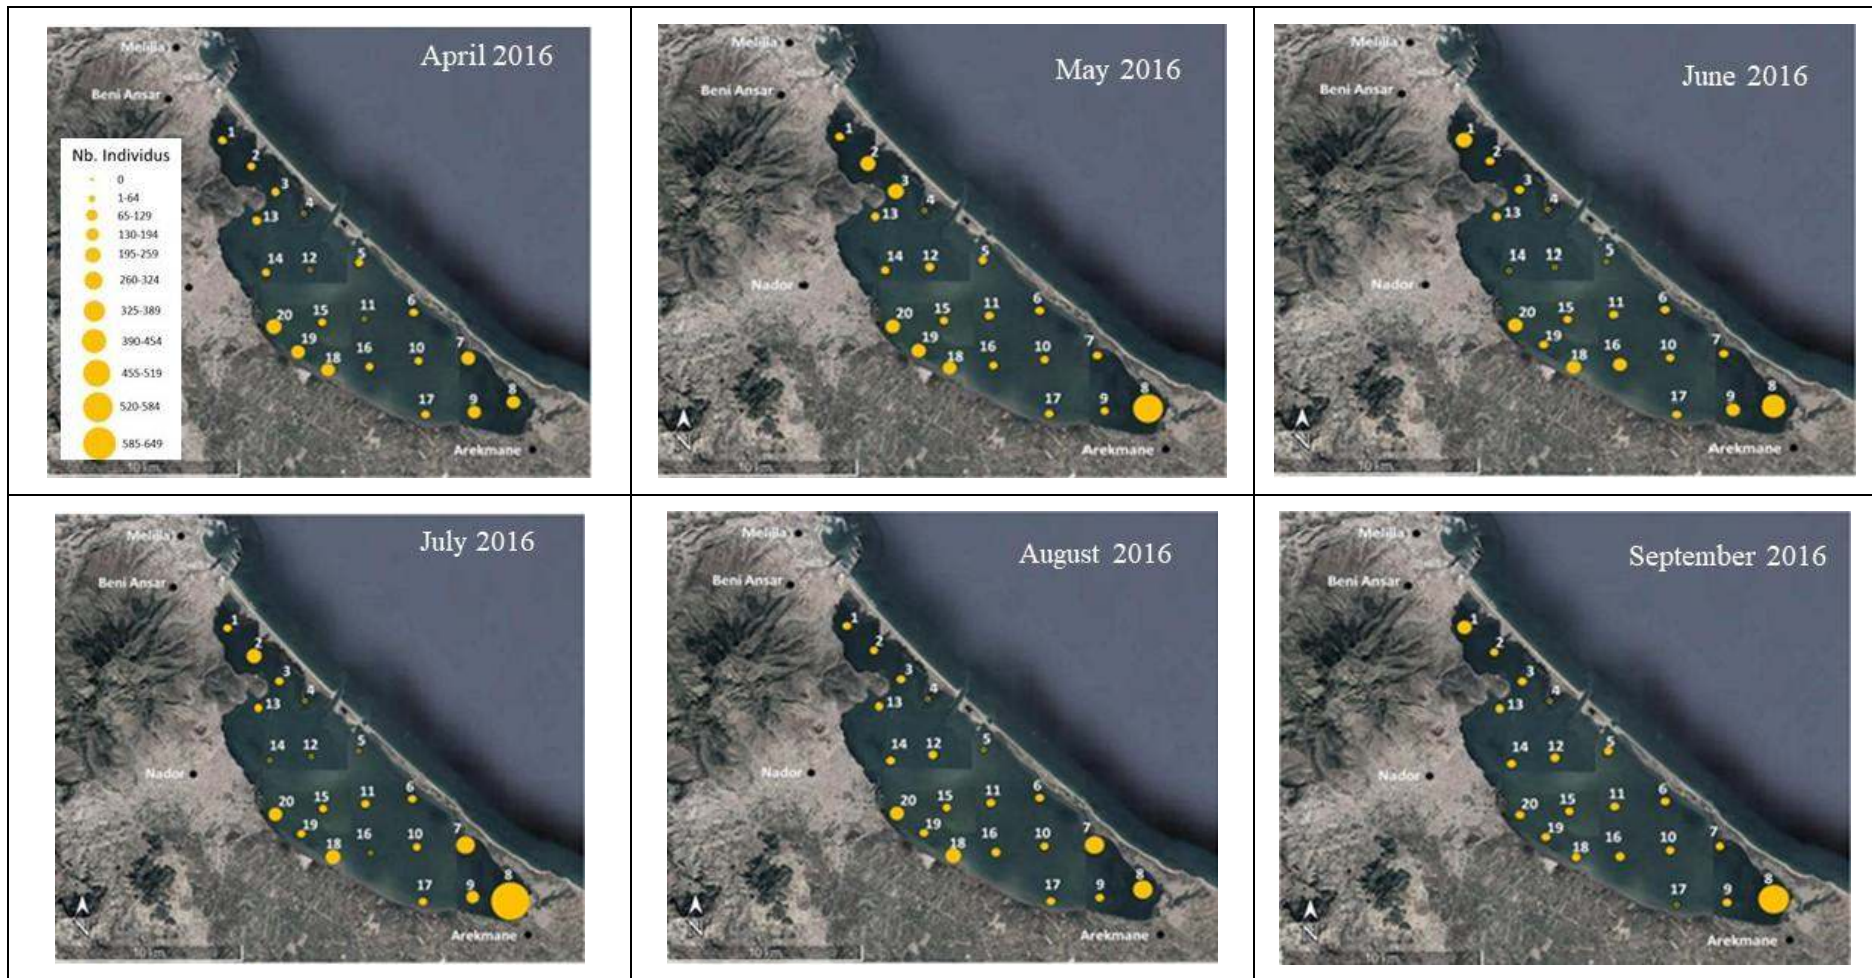

Fig. 3: Spatial and temporal distribution of *Gobius niger* in the Marchica lagoon.

Cluster analysis of *G. niger* abundances in the 20 sampled stations in the Marchica lagoon separated the samples in two significant groups (ANOSIM,  $P < 0.05$ ), labelled as G1 and G2 (Fig. 4). The Group G1, where abundances were high, concerns the NW and the SE extremities of the lagoon and the continental edge located on either side of Oued Selouane where a variety of substrates (mud, muddy-sand, sandy-mud and fine sand) occur, mostly covered by macroalgae and also by seagrass. The group G2 corresponds roughly to the center of the lagoon where the goby was overall less abundant.

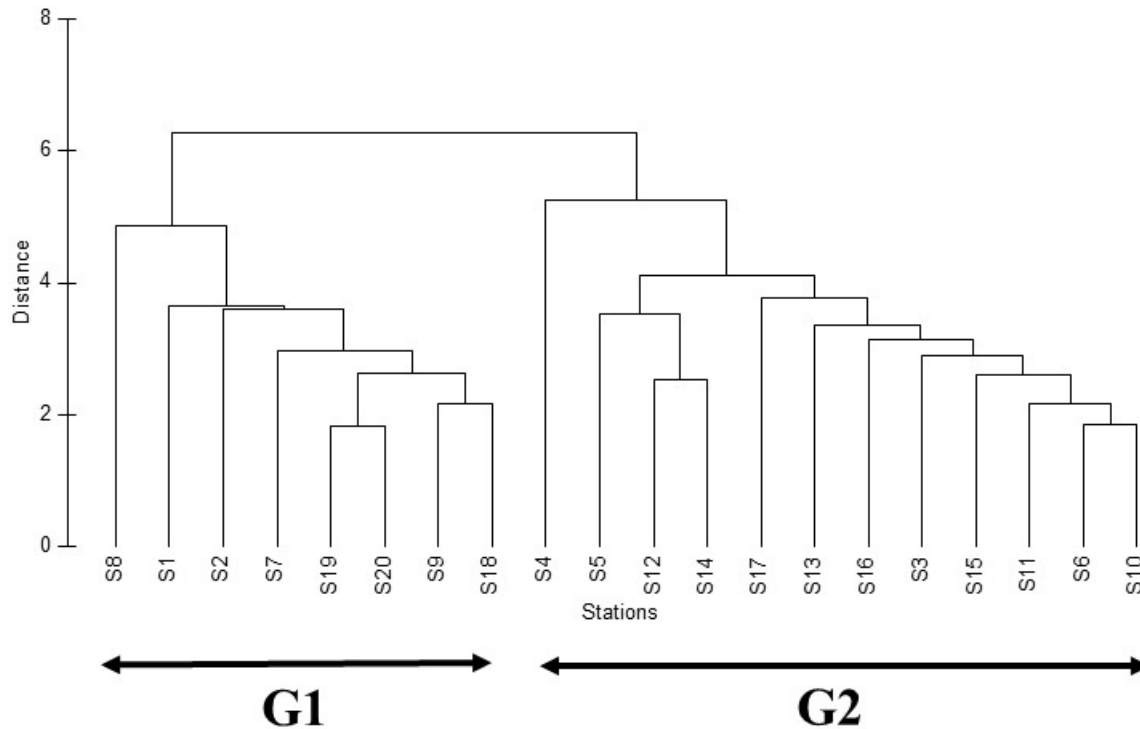

Fig. 4: Cluster analysis based on *Gobius niger* abundances showing reciprocal relations between the 20 sampled stations in the Marchica lagoon according to Euclidean distance similarities.

The DISTLM analysis revealed that depth and temperature had a significant effect ( $p < 0.01$ ), explaining respectively 33% and 19% of the spatial variations of *G. niger* in the Marchica lagoon (Table 1). The remaining variables, salinity, pH and suspended matter, did not show any significant impact and accounted for less than 1% of the variability for each. The first two axes of the dbRDA analysis capture 91.1% of the variability in this fitted model and 46% of the total observed variability (Fig. 5). Depth alone is the best model (lowest AIC value) explaining about 33% of the total variability.

Table 1. Significance of the relationship between abiotic factors and monthly abundances of *Gobius niger*. p: p-value.; Prop. (%): relative contribution of each environmental variable to variation in spatial structure.

| Variable              | SS(trace) | Pseudo-F | p      | Prop. (%) |
|-----------------------|-----------|----------|--------|-----------|
| Temperature (Temp)    | 5757.8    | 4.3282   | 0.004* | 0.19384   |
| Depth                 | 9853.8    | 8.9357   | 0.001* | 0.33174   |
| Salinity              | 2516.3    | 1.666    | 0.127  | 8.47E-02  |
| pH                    | 2893.1    | 1.9424   | 0.091  | 9.74E-02  |
| Suspended Matter (SM) | 1230.2    | 0.77768  | 0.56   | 4.14E-02  |

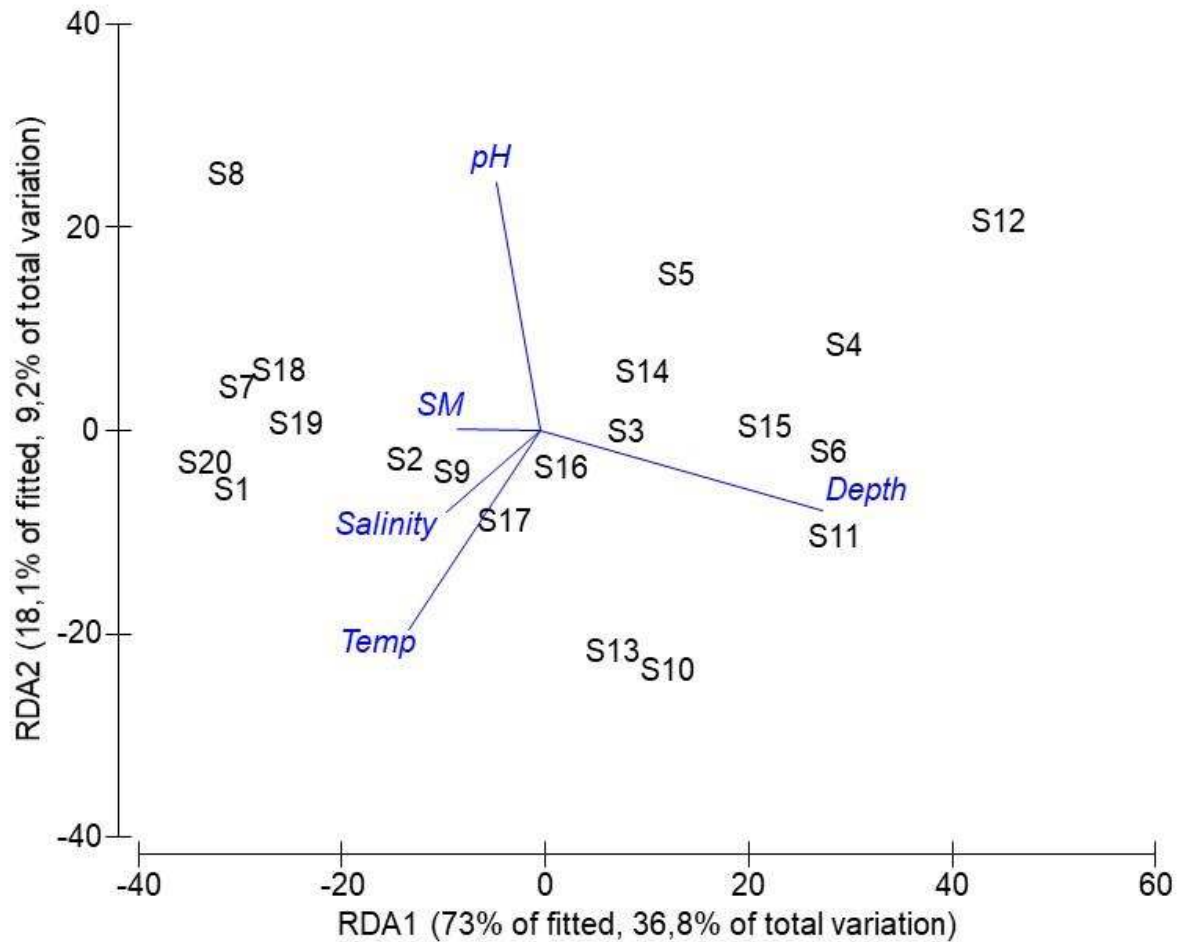

Fig. 5: Two-dimensional redundancy analysis (RDA) ordination representing the model of spatial variation in spatial distribution of *Gobius niger* related to the predictor variables selected through the best linear models based on distance (DISTLM). SM: Suspended matter; Temp: Temperature.

### Site-related footprint

#### Morphometric analysis

Data from meristic characters of the four groups of *Gobius niger* sampled at sea and in the Marchica lagoon are reported in Tables S2 to S5, respectively. Overall, specimens caught at the sea are of a bigger size (SL from 80 mm to 135 mm) compared to the ones from the lagoon (SL from 54 mm to 105 mm).

The allometric relationships ( $\text{Log } Y = a \text{ Log } X = \text{Log } b$ ) between the standard length (SL) and the total length (TL), the head length (HL) and the body height (BC), and on the other hand, between the head length (HL) and the eye diameter (ED) and the snout length (SnL) are summarized in Tables S6 and S7 (*G. niger* from the sea) and Tables S8 and S9 (*G. niger* from the Marchica lagoon). The obtained results revealed significant positive correlations ( $p < 0.05$ ) between all the parameters.

The first PCA performed on the morphometric and meristic data allowed the identification of a distinct stratification based on the origin of the individuals (see Supplementary material

Figure S2). The first two axes are the most informative, representing respectively 78.11% and 9.47% of the total inertia, totalising 87.58% of the total variation. Overall, the first axis is correlated to morphometric characteristics, while the second axis is correlated to meristic characteristics.

The regression of PC1 scores for the different individuals against SL (Fig. 6) revealed a strong correlation between PC1 and SL. The PCA based on the residuals, revealed separation related to geographic origin of specimens (adjacent Moroccan Mediterranean and the Marchica lagoon) without clear distinction related to the colour (clear vs dark specimens) is visible.

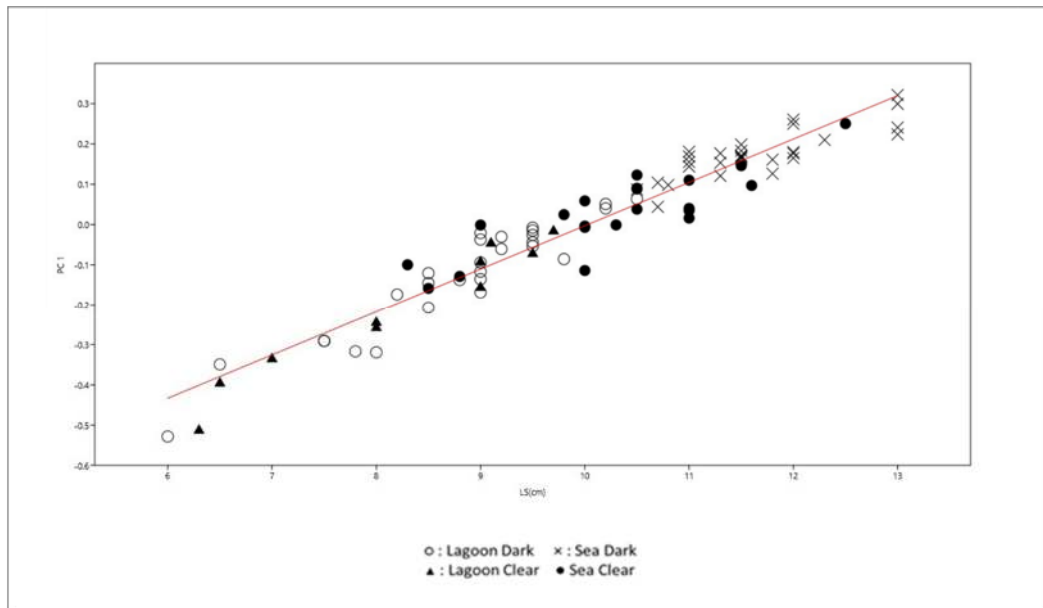

Fig. 6: Linear regression of the principal component score axis (PC1) from morphometric measurements on the log standard length of *Gobius niger* with projection of phenotypic groups.

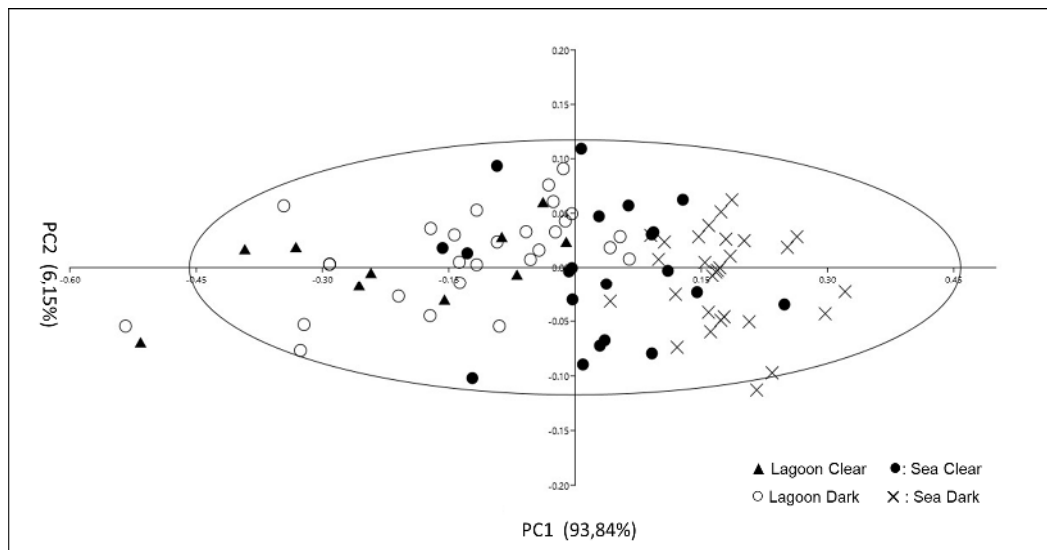

Fig. 7: Principal Component Analysis on the residuals from the regression of PC1 and SL of *Gobius niger* with projection of phenotypic groups.

## Genetic differentiation

From the 120 studied individuals of *G. niger* from Morocco, 88 sequences were obtained. The alignment of the portion of 16S mtDNA gene was 547 base pairs long and contained 26 polymorphic sites; a total of 31 haplotypes were found.

Diversity measures, calculated for the four groups (Sea dark, Sea clear, Lagoon dark, Lagoon clear), are reported in Table 2. The marine population with a dark color shows the highest total number of haplotypes (15) while the population from the lagoon with a clear colour shows the lowest number of haplotypes (6). The highest number of segregating sites (16) is recorded for the population of the lagoon with a dark colour the while the population of the lagoon with clear color shows the lowest number of segregating sites (8). The nucleotide diversity ( $\pi$ ) of the four groups in this study ranges from  $\pm 0.00382$  to  $\pm 0.00502$  while haplotype diversity ( $h$ ) ranged from  $\pm 0.81905$  to  $\pm 0.9365$ . Neutrality test values (Fu & Li's F and Tajima's D) are negative and significant.

Table 2. Results of the haplotype diversity analysis of the four groups of the species *Gobius niger*. N: number of sequences; S: number of segregating sites; Hn: number of haplotypes; Hd: haplotype diversity;  $\pi$ : nucleotide diversity. Significant values at  $\alpha=0.05$ .

| Groups       | N  | S  | Hn | Hd      | $\pi$   | Fu & Li's F | Tajima's D |
|--------------|----|----|----|---------|---------|-------------|------------|
| Sea clear    | 21 | 14 | 11 | 0.81905 | 0.00467 |             |            |
| Sea dark     | 29 | 15 | 15 | 0.87685 | 0.00382 | -2.53758    | -1.71526   |
| Lagoon clear | 10 | 8  | 6  | 0.88889 | 0.00502 |             |            |
| Lagoon dark  | 28 | 16 | 12 | 0.93651 | 0.00432 |             |            |

The maximum parsimony network shows four ancestral haplotypes (numbers 22, 29, 35, 41 in Fig. 8). There is no visible geographical segregation except for the sequences from Turkey and Greece whose haplotypes were not shared with the other individuals.

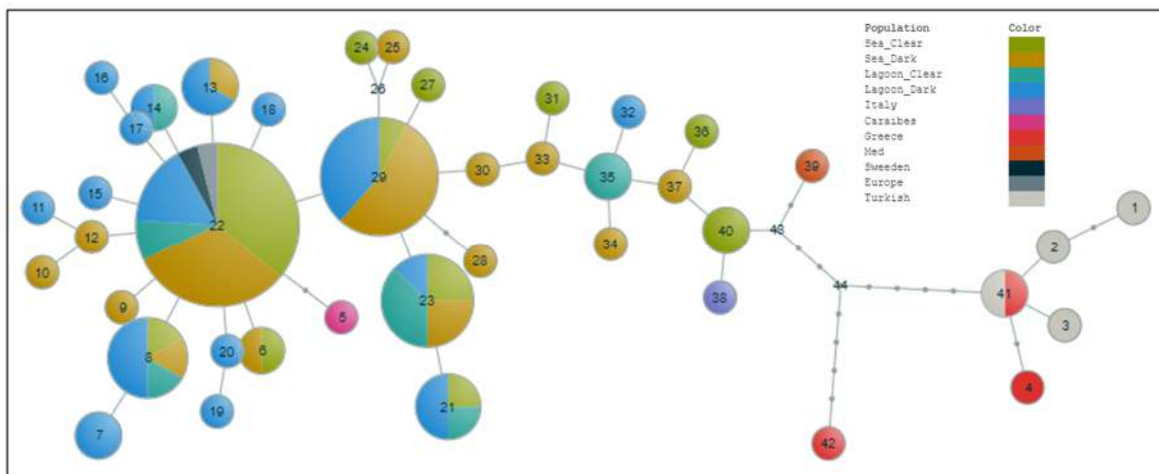

Fig. 8: Haplotype networks constructed from 16S mtDNA sequences of *Gobius niger*. The size of a particular circle reflects the haplotype frequency. The numbers indicate the nodes.

The pairwise  $F_{ST}$  comparisons show, in most cases, low values;  $F_{ST}$  p-values were all not significant (Table 3). This implies that there is no considerable degree of genetic differentiation between the different groups of *G. niger* inhabiting Marchica lagoon.

Table 3. Results of the  $F_{ST}$  population structure analysis of *Gobius niger* from the Marchica lagoon and the adjacent Mediterranean coast of Morocco. p: p-value

| Groups       | Sea clear | Sea dark                                     | Lagoon clear                                  | Lagoon dark                                   |
|--------------|-----------|----------------------------------------------|-----------------------------------------------|-----------------------------------------------|
| Sea clear    | *         | $F_{ST}:-0.02171$<br>$p: 0.89160 \pm 0.0102$ | $F_{ST}: -0.01659$<br>$P: 0.52148 \pm 0.0173$ | $F_{ST}: -0.00730$<br>$p: 0.53223 \pm 0.0177$ |
| Sea dark     | *         | *                                            | $F_{ST}: 0.1161$<br>$p: 0.28125 \pm 0.0136$   | $F_{ST}: 0.00569$<br>$p: 0.27832 \pm 0.0152$  |
| Lagoon clear | *         | *                                            | *                                             | $F_{ST}: 0.02781$<br>$p: 0.14258 \pm 0.0104$  |
| Lagoon dark  | *         | *                                            | *                                             | *                                             |

The result of the Mantel test reports no correlation between the genetic and morphological distance matrices ( $r=-0.11$ ;  $p=0.97$ ), suggesting no isolation by distance and the existence of gene flow between the lagoon and the sea (Fig. 9).

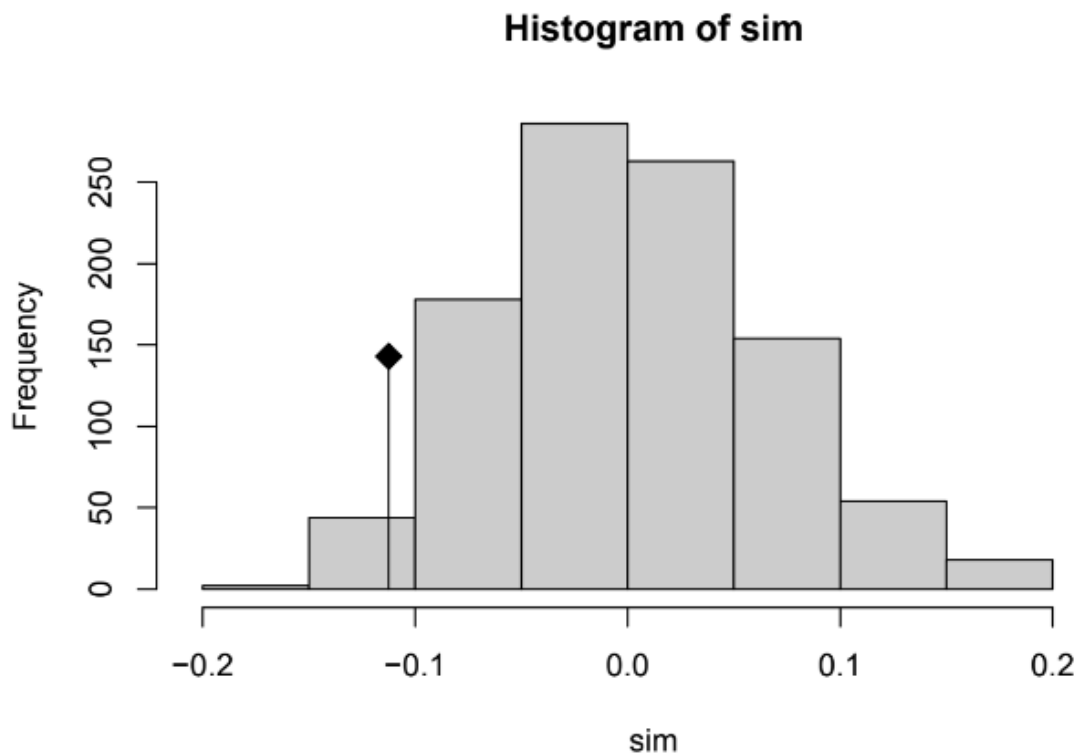

Fig. 9: Histogram of the Mantel test assessing the relationship between genetic and morphologic distance for *Gobius niger*. Sim: simulations; Frequency: frequency values of the correlation between the genetic and morphologic distances.

#### *Monogenean parasites from G. niger*

Of the 180 specimens of *G. niger* examined, no fish was parasitized by monogenean flatworms, either in the sea or in the Marchica lagoon.

## Discussion

### *Spatial and temporal distribution of *Gobius niger* in the Marchica lagoon and environmental drivers*

The spatial and temporal distribution of *G. niger* evidenced that the species is long-lasting present in the Marchica lagoon with higher abundances in the peripheral shallow bottoms of the lagoon on a variety of substrates (mud, muddy-sand, sandy-mud and fine sand) mostly covered by macroalgae and/or seagrass meadows. This is consistent with the ecology of the species in other Mediterranean coastal lagoons where it prefers shallow habitats (<1.5m depth) on sandy and sandy-muddy vegetated beds (Kara & Quignard, 2019). Moreover, its permanent presence in the Marchica lagoon supports its supposed ecological status as sedentary fish (Franco *et al.*, 2008a, 2008b, 2012, Kara & Quignard, 2019; Selfati *et al.*, 2019), being among the most frequent fish (62.8%) in Mediterranean coastal lagoons (Kara & Quignard, 2019). *Gobius niger* plays a key eco-trophic role by providing a link between benthic invertebrates and large predators (Casabianca & Kiener, 1969; Miller, 1979; Raffaelli *et al.*, 1989). Therefore, the shallow beds of the lagoon, where the species is abundant, are key habitats in the Marchica lagoon and need to be considered in all management plans aiming at the conservation of biodiversity and ecological processes. Moreover, being a benthic and sedentary fish, *G. niger* is a suitable candidate to monitor the ecological status of the Marchica lagoon, especially in its most disturbed peripheral areas (Ben Hassine *et al.*, 1999). Indeed, *G. niger* has been used in many pollution monitoring studies (Maradonna & Carnevali, 2007; Ramsak *et al.*, 2007; Barucca *et al.*, 2006; Migliarini *et al.*, 2005; Maradonna *et al.*, 2004; Fossi *et al.*, 1989; Katalay & Parkak, 2002; Barucca *et al.*, 2006).

Overall, according to our results, depth and temperature are important predictors explaining the distribution of *G. niger* in the lagoon, with depth being the most contributing variable. This is in accordance with the distribution patterns of fish assemblages in the Marchica lagoon where a spatial gradient in the benthic-demersal component of the fish assemblage structure was observed, with more marine species occurring near the sea inlet and more resident species in the lagoon inner margins (Selfati *et al.*, 2019). Moreover, depth is a key factor for understanding the structure of fish assemblages in the Marchica lagoon, but has to be seen as a variable that acts in concert with other factors such as vegetation cover, pH, temperature and dissolved oxygen for benthic-demersal fish, and salinity and suspended matter for pelagic fish (Selfati *et al.*, 2019). The significant decrease of *G. niger* during winter could be related to low temperatures during this season leading to migration of the species to marine waters (Mozzo, 1968). Another explanation proposed by Arruda *et al.*, (1993) in the Ria de Aveiro Lagoon (Portugal) is the massive mortality following the spawning period. However, in-depth investigations are required to verify these hypotheses.

### Comparison of goby populations

#### *Morphometric patterns*

In the Moroccan Mediterranean, the black goby has been previously reported both in the lagoon and in the open sea (Aloncle, 1951; Selfati *et al.*, 2019). The work of Böhlke & Robins (1968), Hoese (1971, 1983), Bath (1973), Akihito (1986), Gill *et al.*, (1992), and more recently by Bouchereau *et al.* (2000) and Kovačić & Golani (2007) has shown that the SL of the head and trunk is very useful in the classification of genera and species of Gobiidae. The difference



in size between individuals from the lagoon and their marine counterparts is probably due to the differential depth of the two sites. Indeed, the majority of fishes show a size positively correlated with depth (Harvey & Stewart, 1991). Fish are exposed to the risk of predation; to reduce it they choose deeper habitats, and therefore will have a longer life span which should be reflected to some extent by a larger body size (Harvey & Stewart, 1991).

It has been reported that there are light and dark specimens of *G. niger*. This coloration may be related to sex and/or age as the colour of *G. niger* is generally darker in males than females and becomes very dark with age (Bodilis & Le Bris, 2018; De Casabianca & Kiener, 1969).

#### *Genetic structure: lagoon and open sea*

The genetic structure of marine fish populations reflects the historical and contemporary interaction between a complex set of ecological, demographic, behavioral, genetic, oceanographic, climatic, and tectonic processes. The combined effect of these mechanisms, acting on a range of spatial and temporal scales, determines the rates and patterns of dispersal of gametes, zygotes, larvae and adults (Giovannotti et al 2009).

Our study revealed the presence of common haplotypes shared by the four recognized groups based on the combination of colour pattern and habitat. According to Bortone *et al.* (2005), *G. niger* is considered as a resident species in the Marchica lagoon (Selfati, 2020). However, the results of our study suggest recurrent migrations between the groups of the sea and lagoon. Indeed, the haplotype network reconstruction revealed no apparent population subdivision and no geographical segregation between lagoon and sea.  $F_{ST}$  values are used to conclude the level of gene flow (Shyama Sundari Devi Chanthran *et al.*, 2020). According to Wright (1965), populations with  $F_{ST}$  of 0–0.05 show a small differentiation, 0.05–0.15 is considered as moderate differentiation, 0.15–0.25 as important differentiation and values greater than 0.25 as very important differentiation. The occurrence of common haplotypes between the groups and small to moderate differentiation based on  $F_{ST}$  results suggests unrestricted gene flow with no relation to the colour form and habitat.

#### *Parasites of G. niger*

Monogenean parasites are one of the largest groups of Platyhelminthes characterised by high species diversity and high host specificity (Gusev, 1995; Kearns, 1994; Poulin, 1998). The most abundant genus of monogeneans in gobies as well as in many other fishes is *Gyrodactylus* von Nordmann, 1832. According to Huyse and Volckaert (2005) *Gyrodactylus* species parasitize on 19 orders of fresh and marine bony fishes. To date, three *Gyrodactylus* spp. parasitizing *G. niger* have been recorded: *Gyrodactylus flesi* Malmberg, 1957; *G. proterorhini* Ergens, 1967 and *G. niger* sp. Huyse *et al.* 2003 from North Sea (Huyse *et al.*, 2003; Harris *et al.*, 2004).

The absence of monogenean parasites on the gills and the skin of *G. niger* from the Marchica lagoon and sea could be explained by environmental conditions. Another explanation of this absence is the immune system of fishes. Indeed, Zander *et al.* (1999) and Zander (1993) showed that in the Baltic Sea, *Podocotyle atomon* (Rudolphi, 1802) is present in high abundances; however in *G. niger* this species was often absent, which was explained by its immune system efficiency.

## Conclusion

*Gobius niger* was revealed to be a year-long present fish in the Marchica lagoon with the higher abundances recorded in the shallow bottoms of the lagoon inner margins on a variety of mostly vegetated substrates and with general decrease in abundances during winter. Depth is a key factor for understanding the spatial patterns of *G. niger* in Marchica lagoon, but has to be seen as a variable that acts in concert with other factors such as vegetation cover, pH, and temperature among others. Thus, the shallow beds of the lagoon, where the species is abundant, are key habitats in the Marchica lagoon and need to be considered in all management plans aiming at the conservation of biodiversity and ecological processes.

Comparison of black goby populations from the Marchica lagoon with their counterparts from the adjacent Mediterranean coast of Morocco revealed that specimens caught at the sea are of a bigger size compared to the ones from the lagoon without any effect of the colour morphs observed (dark vs clear). Moreover, the absence of population structuring, low genetic diversity and common haplotypes between the two populations indicates no apparent restriction in the gene flow between the two populations. Moreover, the morphometric differences and colour morphs observed seems to be unrelated to genetic differences.

## Acknowledgements

This research was supported by the Special Research Fund of Hasselt University (BOF21PD01 to N.K.; BOF20TT06 to M.P.M.V.; BOF21INCENT09) and by research grant 1513419N of the Research Foundation – Flanders (FWO-Vlaanderen). The sampling survey was undertaken in the framework of an international cooperation between Le Conservatoire du Littoral, Agence de l'Eau Rhône-Méditerranée-Corse, the Ecocean Society, University Mohammed V in Rabat, Institut National de Recherche Halieutique, Observatoire de la Marchica, and Fondation Mohammed VI pour l'environnement. M. Selfati thanks the "Agence de l'Eau Rhône Méditerranée Corse" and the Ecocean Society for their financial support. Authors are very grateful to fishers for providing *Gobius niger* samples from both the Marchica lagoon and the adjacent Mediterranean coast of Morocco.

## Supplementary material

The following supplementary material is available for this article:

Table S1: Summary of species included in the phylogenetic tree, with accession numbers and locations of each species.

Table S2. Meristic characters of clear *Gobius niger* individuals from the Mediterranean Sea. N: number; m: mean; M: mode; S: standard deviation; Sm: standard error of the mean.

Table S3. Meristic characters of dark *Gobius niger* individuals from the Mediterranean Sea. N: number; m: mean; M: mode; S: standard deviation; Sm: standard error of the mean.

Table S4. Meristic characters of clear *Gobius niger* individuals from Marchica lagoon. N: number; m: mean; M: mode; S: standard deviation; Sm: standard error of the mean.

Table S5. Meristic characters of dark *Gobius niger* individuals from Marchica lagoon. N: number; m: mean; M: mode; S: standard deviation; Sm: standard error of the mean.

Table S6. Allometric relationships between various numerical characters measured in clear *Gobius niger* from the adjacent Moroccan Mediterranean Sea. SL: standard length; TL: total length; HL: head length; BH: body height; ED: eye diameter, N: number; r: correlation coefficient.

Table S7. Allometric relationships between various numerical characters measured in dark *Gobius niger* from the adjacent Moroccan Mediterranean Sea. SL: standard length; TL: total length; HL: head length; BH: body height; ED: eye diameter, N: number; r: correlation coefficient.

Table S8. Allometric relationships between various numerical characters measured in clear *Gobius niger* from Marchica lagoon. SL: standard length; TL: total length; HL: head length; BH: body height; ED: eye diameter, N: number; r: correlation coefficient.

Table S9. Allometric relationships between various numerical characters measured in dark *Gobius niger* from Marchica lagoon. SL: standard length; TL: total length; HL: head length; BH: body height; ED: eye diameter, N: number; r: correlation coefficient.

Figure S1. Phylogenetic tree including all the species of *Gobius* that are represented on GenBank by a targeted a fragment of the 16S rRNA gene.

Figure S2. Principal Component Analysis of morphological variables of the *Gobius niger* (standard length, SL ; body height, BH; head length, HL; snout length, SnL; eye diameter, ED; first dorsal fin, DF1; second dorsal fin, DF2; anal fin, AF; pectoral fin, PF and ventral fin, VF) with projection of phenotypic groups.

## References

- Akaike, H., 1973. Information theory and an extension of the maximum likelihood principle. p. 716- 723. In *2<sup>nd</sup> International Symposium of Information Theory*. Ed. by N. Petrov, and F. Csaki. Akademia Kiado, Budapest.
- Aliaume, C., Do Chi, T., Viaroli, P., Zaldívar, JM., 2007. Coastal lagoons of Southern Europe: recent changes and future scenarios. *Transitional Waters Monographs*, 1 (1), 1-12.
- Aljanabi, SM., Martinez, I., 1997. Universal and rapid salt-extraction of high quality genomic DNA for PCR-based techniques. *Nucleic Acids Research*, 25, 4692-4693.
- Aloncle, H. 1961. La pêche dans la "Mar Chica" de Mellila. *Bulletin de l'Institut des Pêches Maritimes du Maroc*, 7, 13-32.
- Anderson, M.J., Gorley, R.N., Clarke, K. R., 2008. PERMANOVA+ for PRIMER. Guide to software and statistical methods. *Primer-E: Plymouth*, UK.
- Arruda, L. M., Azevedo, J., Neto, A. I., 1993. Abundance, age-structure and growth and reproduction of gobies (Pisces, Gobiidae) in the Ria de Aveiro Lagoon (Portugal). *Estuarine, Coastal and Shelf Science*, 37, 509-523.
- Barucca, M., Canapa, A., Olmo, E., Regoli, F., 2006. Analysis of vitellogenin gene induction as a valuable biomarker of estrogenic exposure in various Mediterranean fish species. *Environmental Research*, 101, 68-73.
- Ben Hassine, O.K., Benmansour, B., Neifar, L., Bahri, L., Hajji, T. *et al.*, 1999. L'état de la biodiversité dans les sites à activité halieutique du littoral est de la Tunisie. *L'Homme et la mer. Cahiers du C.E.R.S., série Géographique*, 21, 277-333.

- Bloundi, M.K., 2005. *Étude géochimique de la lagune de Nador (Maroc oriental) : Impacts des facteurs anthropiques*. Thèse en cotutelle. École et Observatoire des Sciences de la Terre, Centre de Géochimie de la Surface (UMR 7517) Et Université Mohamed V Agdal Faculté des Sciences de Rabat, Maroc, 238 pp.
- Boban, J., Isajlović, I., Zorica, B., Kec, V.Č., Vrgoč, N., 2013. Biometry and Distribution of the Black Goby *Gobius niger* (Linnaeus, 1758) in the Adriatic Sea. *Acta Adriatica*, 54 (2), 265 – 272.
- Böhlke, J.E., Robins, C.R., 1968. Western Atlantic seven-spined gobies, with description of ten new species and a new genus, and comments on Pacific relatives. *Proceedings of the Academy of Natural Sciences of Philadelphia*, 120 (3), 45-174.
- Bortone, S.A., Dunson, W.A.; Greenawalt, J.M., 2005. Fishes as Estuarine Indicators. *Estuarine Indicators*; CRC Press: Boca Raton, FL, USA, pp. 381–389.
- Bouchereau, J.L., Durel, J.S., Guelorget, O., Louali, L.R., 2000. L'ichtyofaune dans l'organisation biologique d'un système paralique : la lagune de Nador, Maroc. *Cybium*, 10 (1-2), 69-76.
- Bouchereau, J.L., Gros, O., 2010. Étude du système latéral des Gobiidae: comparaison de méthodes d'observation. *Cybium*, 34 (1), 11-18.
- Breine, J., Quataert, P., Stevens, M., Ollevier, F., Volckaert, F. A. *et al.*, 2010. A zone-specific fish-based biotic index as a management tool for the Zeeschelde estuary (Belgium). *Marine Pollution Bulletin*, 60 (7), 1099-1112.
- Čekovská, K., Šanda, R., Eliasova, K., Kovacic, M., Zogaris, S. *et al.*, 2020. Population genetic diversity of two marine gobies (Gobiiformes: Gobiidae) from the North-Eastern Atlantic and the Mediterranean Sea. *Journal of Marine Science and Engineering*, 8 (10), 792.
- Chiesa, L.M., Radmila, P., Maria, N., Federica, D.C., Renato, M. *et al.*, 2020. Discrimination between fresh and frozen-thawed fish involved in food safety and fraud protection. *Foods*, 9 (12), 1896.
- Clarke, K.R., Gorley, R.N., Somerfield, P.J., Warwick, R.M., 2014. Change in marine communities: an approach to statistical analysis and interpretation, 3rd edition. *PRIMER-E: Plymouth*.
- De Casabianca, M.L., Kiener, A., 1969. Gobiidés des étangs corses : Systématique, écologie, Régime alimentaire et position dans les chaînes trophiques. *Vie et Milieu*, 20 (3), 611-634.
- Eisenreich, S.J., 2005. Climate Changes and the European Water Dimension. *A Report to the European Water Directors*. EUR 21553 EN. IES-JRC, European Commission, Ispra, Italy, 253 pp.
- El Kamcha, R. E., Bououarour, O., Boutoumit, S., Bazairi, H., 2020. Occurrence of the invasive *Caprella scaura* Templeton, 1836 (Amphipoda: Caprellidae) in the Marchica coastal lagoon (Alboran Sea, Morocco). *BioInvasions Records*, 9 (4), 763-771.

- Excoffier, L., Lischer, H.E.L., 2010. Arlequin suite ver 3.5: A new series of programs to perform population genetics analyses under Linux and Windows. *Molecular Ecology Resources*, 10, 564–567.
- Facca, C., Cavarro, F., Franzoi, P., Malavasi, S., 2020. Lagoon resident fish species of conservation interest according to the habitat directive (92/43/CEE): A review on their potential use as ecological indicator species. *Water*, 12, 2059.
- Fossi, C., Leonzio, C., Focardi, S., 1989. Regulatory detoxication responses in Gobiidae experimentally exposed to PCBs. *Ecotoxicology and Environmental Safety*, 18 (1), 11-14.
- Franco, A., Franzoi, P., Malavasi, S., Riccato, F., Torricelli, P., 2006. Fish assemblages in different shallow water habitats of the Venice Lagoon. *Hydrobiologia*, 555 (1), 159–174.
- Franco, A., Elliott, M., Franzoi, P., Torricelli, P., 2008a. Life strategies of fishes in European estuaries: the functional guild approach. *Marine Ecology Progress Series*, 354, 219-228.
- Franco, A., Franzoi, P., Torricelli, P., 2008b. Structure and functioning of Mediterranean lagoon fish assemblages: A key for the identification of water body types. *Estuarine, Coastal and Shelf Science*, 79 (3), 549-558.
- Franco, A., Pérez-Ruzafa, A., Drouineau, H., Franzoi, P., Koutrakis, E.T. *et al.*, 2012. Assessment of fish assemblages in coastal lagoon habitats: effect of sampling method. *Estuarine, Coastal and Shelf Science*, 112, 115–125.
- Gaamour, A., Missaoui, M., El Abed, A., Deniel, Ch., 2001. Age et croissance de l'allache ou sardinelle ronde (Valenciennes, 1847) dans la région du Cap Bon (Tunisie). *Bulletin de l'Institut National des Sciences et Technologies de la Mer de Salammbô*, 28, 23-35.
- Giovannotti, M., Mario, L.M., Vincenzo, C., 2009. Life Style and Genetic Variation in Teleosts: the Case of Pelagic (*Aphia minuta*) and Benthic (*Gobius niger*) Gobies (Perciformes: Gobiidae). *Marine Biology*, 156 (3), 239-52.
- Goren, M., Stern, N., 2021. *Cryptocentrus steinhardti* (Actinopterygii; Gobiidae): a new species of shrimp-goby, and a new invasive to the Mediterranean Sea. *PeerJ*, 9 (6), e12136.
- Hammer, Ø., Harper, D.A.T., Ryan, P.D., 2001. PAST: paleontological statistics software package for education and data analysis. *Palaeontologia Electronica*, 4, 1–9.
- Harvey, B. C., Stewart, A. J., 1991. Fish size and habitat depth relationships in headwater streams. *Oecologia*, 87 (3), 336-42.
- Holmlund, C.M., Hammer, M., 1999. Ecosystem services generated by fish populations. *Ecological Economics*, 29, 253–268.
- Huyse, T., Volckaert, F.A.M., 2005. Comparing host and parasite phylogenies: *Gyrodactylus* flatworms jumping from goby to goby. *Systematic Biology*, 54 (5), 710–718.
- Huyse, T., Audenaert, V., Volckaert, F.A.M., 2003. Speciation and host–parasite relationships in the parasite genus *Gyrodactylus* (Monogenea, Platyhelminthes) infecting gobies of the

- genus *Pomatoschistus* (Gobiidae, Teleostei). *International Journal for Parasitology*, 33 (14), 1679-89.
- Iglésias, S. P., Vukić, J., Sellos, D. Y., Soukupová, T., Šanda, R., 2021. *Gobius xoriguer*, a new offshore Mediterranean goby (Gobiidae), and phylogenetic relationships within the genus *Gobius*. *Ichthyological Research*, 68(3), 445-459.
- Kada, O., Abdellaoui, S., Ramdani, M., Nachit, D., 2009. Contribution à l'identification et à la caractérisation biologique et dynamique de l'anchois de la lagune de Nador (Maroc), *Bulletin de l'Institut Scientifique, Rabat, section Sciences de la Vie*, 2, 91-98.
- Kara, M.H., Quignard J.P., 2019. Fishes in Lagoons and Estuaries in the Mediterranean 2: Sedentary Fish. In *Ecological science series*. ISTE Ltd and John Wiley & Sons, Inc., 423p.
- Katalay, S., Parlak, H., 2002. Su kirliliğinin, *Gobius niger* Linnaeus, 1758 (Pisces: Gobiidae)'in kan parametreleri üzerine etkileri. *Ege Journal of Fisheries and Aquatic Sciences*, 19(1), 115-121.
- Kjerfve, B., 1994. Coastal Lagoons. *Elsevier Oceanographic series*, 1-8,
- Koutrakis, E.T., Tsikliras, A.C., Sinis, A.I. 2005. Temporal variability of the ichthyofauna in a Northern Aegean coastal lagoon (Greece). Influence of environmental factors. *Hydrobiologia*, 543(1), 245-57.
- Kovačić, M., 2020. Checklist of gobies (Teleostei: Gobiidae) of the Mediterranean Sea and a key for species identification. *Zootaxa*, 4877(1), 75-101.
- Kovačić, M., D. Golani, D., 2007. First record of *Papillogobius melanobranchus* in the Mediterranean Sea and new data on geographic distributions, bathymetric ranges and morphology of several small benthic fishes in the Levant. *Cybium*, 31(4), 417-425.
- Kovačić, M., Patzner, R.A., 2011. North-Eastern Atlantic and Mediterranean Gobies. p. 177-206. In: Patzner, R.A., Van Tassell, J.L., Kovačić, M., Kapoor, B.G. (Eds.). *The Biology of Gobies*. Science Publishers, Jersey, British Isles.
- Kovačić, M., Šanda, R., Čekovská, K., Soukupová, T., & Vukić, J., 2021. *Zebrus pallaoroi* sp. nov.: a new species of goby (Actinopterygii: Gobiidae) from the Mediterranean Sea with a dna-based phylogenetic analysis of the *Gobius*-lineage. *Contributions to Zoology*, 90(3), 285-317.
- Kvach, Y., Stepien, C.A., 2008. Metazoan parasites of introduced round and tubenose gobies in the great lakes: Support for the "enemy release hypothesis". *Journal of Great Lakes Research*, 34 (1), 23-35.
- Legendre, P., Anderson, M. J., 1999. Distance-based redundancy analysis: testing multispecies responses in multifactorial ecological experiments. *Ecological Monographs* 69, 24.

- Levin, L.A., Boesch, D.F., Covich, A., Dahm, C., Erseus, C. *et al.*, (2001). The function of marine critical transition zones and the importance of sediment biodiversity. *Ecosystems*, 4, 430–451.
- Lopes, R., Videira, N., 2013. Valuing marine and coastal ecosystem services: an integrated participatory framework. *Ocean & Coastal Management*, 84, 153-162.
- Maradonna, F., Carnevali, O., 2007. Vitellogenin, zonaradiata protein, cathepsin D and heat shock protein 70 as biomarkers of exposure to xenobiotics. *Biomarkers*, 12, 240-255.
- Maradonna, F., Polzonetti, V., Bandiera, S. M., Migliarini, B., Carnevali, O., 2004. Modulation of the hepatic CYP1A1 system in the marine fish *Gobius niger*, exposed to xenobiotic compounds. *Environmental science & technology*, 38(23), 6277-6282.
- Matschiner, M., 2016. Fitchi: Haplotype genealogy graphs based on the fitch algorithm. *Bioinformatics*, 32 (8), 1250-52.
- McArdle, B.H., Anderson, M.J., 2001. Fitting multivariate models to community data: a comment on distance-based redundancy analysis. *Ecology*, 82, 290–297.
- Menif, D., 2000. *Les Gobiidés des côtes tunisiennes : Morphologie et biologie de Zosterisessor ophiocephalus (Pallas, 1811) et Gobius niger Linnaeus, 1758*. Thèse Doctorat, Université de Tunisie, 233 p + annexes.
- Migliarini, B., Campisi, A. M., Maradonna, F., Truzzi, C., Annibaldi, A. *et al.*, 2005. Effects of cadmium exposure on testis apoptosis in the marine teleost *Gobius niger*. *General and Comparative Endocrinology*, 142(1-2), 241-247.
- Miller, J. M. 1988. Physical processes and the mechanisms of coastal migration of immature marine fishes. *American Fisheries Society Symposium*, 3, 68-76.
- Newton, A., Brito, A., Icely, J., Derolez, V., Clara, I. *et al.*, 2018. Assessing, quantifying and valuing the ecosystem services of coastal lagoons. *Journal for nature conservation*, 44, 50-65.
- Newton, A., Icely, J., Cristina, S., Brito, A., Cardoso, A.C. *et al.*, 2014. An overview of ecological status, vulnerability and future perspectives of European large shallow, semi-enclosed coastal systems, lagoons and transitional waters. *Estuarine, Coastal and Shelf Science*, 140, 95-122.
- Oden, B. (1914). *Notas sobre Biología y aprovechamiento de Mar Chica*. Anuario le pesca y esladistico de la marina mercante y de la pesca del ano 1911, Madrid, 1012.
- Pérez-Ruzafa, A., De Pascalis, F., Ghezzi, M., Quispe, J. I., Hernández-García, R. *et al.*, 2019. Connectivity between coastal lagoons and sea: asymmetrical effects on assemblages' and population's structure. *Estuarine, Coastal and Shelf Science*. 216, 171-186.
- Raffaelli, D., Conacher, A., M, H., Emes, C., 1989. The role of epibenthic crustacean predators in an estuarine food web. *Estuarine, Coastal and Shelf Science*, 28(2), 149-160.

- Ramšak, A., Stopar, K., Sepčić, K., B.Z, M., Bajt, O. *et al.*, 2007. Reflection of hydrocarbon pollution on hepatic EROD activity in the black goby (*Gobius niger*). *Environmental toxicology and pharmacology*, 24(3), 304-310.
- Renoult, J.P., Pillon, R., Kovačić, M., Louisy, P., 2022. Frontiers in Fishwatching Series— Gobies of the North-eastern Atlantic and the Mediterranean: *Gobius* and *Thorogobius*. P.1–237. In *Les Cahiers de la Fondation Biotope: Cayenne, France*.
- Rozas, J., Ferrer-Mata, A., Sánchez-DelBarrio, J.C., Guirao-Rico, S., Librado, P. *et al.*, 2017. DnaSP 6: DNA sequence polymorphism analysis of large data sets. *Molecular Biology Evolution*, 34, 3299–3302.
- Schliewen, U.K., Kovačić, M., 2008. *Didogobius amicuscaridis* spec. nov. and *D. wirtzi* spec. nov., Two new species of symbiotic gobiid fish from São Tomé and Cape Verde Islands, *Spixiana*, 31(2), 247-261.
- Selfati, M., 2020. *Faune ichtyque de la lagune de Marchica : Approche quantitative de la fonction de nourricerie et potentialités de restauration écologique*. Thèse Doctorat. Université Mohammed V de Rabat, 217pp.
- Selfati, M., El Ouamari, N., Crocetta, F., Mesfioui, A., Boissery, P. *et al.*, 2017. Closing the circle in the Mediterranean Sea: *Bursatella leachii* Blainville, 1817 (Mollusca: Gastropoda: Anaspidea) has reached Morocco. *BioInvasions Records*, 6(2), 129–134.
- Selfati, M., El Ouamari, N., Franco, A., Lenfant, P., Lecaillon, G. *et al.*, 2019. Fish assemblages of the Marchica lagoon (Mediterranean, Morocco): Spatial patterns and environmental drivers. *Regional Studies in Marine Science*, 32, 100896.
- Stein, R. A., DeVries, D. R., Dettmers, J. M., 1995. Food-web regulation by a planktivore: exploring the generality of the trophic cascade hypothesis. *Canadian Journal of Fisheries and Aquatic Sciences*, 52(11), 2518-2526. doi.org/10.1139/f95-842.
- Sturges, H.A., 1926. The choice of a class interval. *Journal of the American Statistical Association*, 21(153), 65-66.
- Tereza, S., 2015. *Parasitation of the European marine gobies (Gobiidae, Perciformes) by metazoan parasites*. Bachelor thesis. Charles University, Prague, 44 pp.
- Vanhove, M. P. M., Economou, A. N., Zogaris, S., Larmuseau, M. H. D., Giakoumi, S. *et al.*, 2012. Phylogenetics and biogeography of the Balkan ‘sand gobies’ (Teleostei: Gobiidae): vulnerable species in need of taxonomic revision. *Biological Journal of the Linnean Society*, 105(1), 73-91.
- Vanhove, M. P. M., Giakoumi, S., Zogaris, D., Kovačić, M., Huyse, T., 2022. First Eastern Mediterranean record of *Xenoligophoroides cobitis*, the only dactylogyrid monogenean infecting Mediterranean gobies: just arrived or missed the boat? *Diversity*, 14(8), 580.



- Vanhove, M. P. M., Kovačić, M., Zogaris, S., 2016. A distinct island population of threatened freshwater fish: to split or lump? *Hydrobiologia*, 777(1), 79-93.
- Vanni, M. J., 2002. Nutrient cycling by animals in freshwater ecosystems. *Annual Review of Ecology and Systematics*, 33(1), 341-370.
- Vasconcelos, J. T., Galyean, M. L., 2007. Nutritional recommendations of feedlot consulting nutritionists: the 2007 Texas Tech University survey. *Journal of Animal Science*, 85(10), 2772- 2781.
- Vesey, G., Langford, T.E., 1985. The biology on the black goby, *Gobius niger* L. in an English South Coast Bay. *Journal of Fish Biology*, 27, 417-429.
- Whitfield, A.K., Elliott, M., 2002. Fishes as indicators of environmental and ecological changes within estuaries – a review of progress and some suggestions for the future. *Journal of Fish Biology*, 61, 229–250.
- Wright, S., 1965. The interpretation of population structure by F-statistics with special regard to system of mating. *Evolution*, 19, 395-420.
- Zander, C.D., Strohbach, U., Groenewold, S., 1993. The importance of gobies (Gobiidae, Teleostei) as hosts and transmitters of parasites in the SW Baltic. *Helgoländer Meeresuntersuchungen*, 47(1), 81–111.
- Zander, C. D., Reimer, W., Barz, K., Bight, È., 1999. Parasite communities of the Salzhaff (Northwest Mecklenburg, Baltic Sea) I. Structure and dynamics of communities of littoral fish, especially small-sized fish. *Parasitology Research*, 85, 356-372.

## Supplementary Materials

Table S1: Summary of species included in the phylogenetic tree, with accession numbers and locations of each species.

| <b>Species</b>               | <b>Accession number</b> | <b>Locations</b>                  |
|------------------------------|-------------------------|-----------------------------------|
| <i>Gobius niger</i>          | KJ128783                | Sweedden                          |
|                              | KF415385                | Europe                            |
|                              | EF218645                | Italy, Ancona                     |
|                              | AF067269                | Mediterranean                     |
|                              | FJ460203                | Turkish                           |
|                              | FJ460202                | Turkish                           |
|                              | FJ460201                | Turkish                           |
|                              | FJ460192                | Turkish                           |
|                              | AF491118                | Caraibes                          |
|                              | ON847339                | Greece                            |
|                              | ON847340                | Greece                            |
|                              | ON847341                | Greece                            |
|                              | ON847342                | Greece                            |
| <i>Gobius paganellus</i>     | AF518216                | Unpublished                       |
|                              | EF218651                | Italy, Ancona                     |
|                              | FJ460204                | Turkish                           |
|                              | AF067271                | Mediterranean                     |
| <i>Gobius bucchichi</i>      | EF218642                | Italy, Napoli                     |
|                              | FJ460197                | Turkish                           |
|                              | AF067268                | Mediterranean                     |
| <i>Gobius cobitus</i>        | EF218644                | Italy, Ancona                     |
|                              | FJ460198                | Turkish                           |
| <i>Gobius cruentatus</i>     | EF218641                | Italy, Napoli                     |
| <i>Gobius auratus</i>        | AF067267                | Mediterranean                     |
| <i>Gobius xanthocephalus</i> | AF491117                | Spain, Gran Canaria, Puerta Ricco |
| <i>Gobius vitatus</i>        | GQ485305                | Turkish                           |
| <i>Gobius Couchi</i>         | FJ460199                | Turkish                           |
| <i>Gobius geniporus</i>      | FJ460200                | Turkish                           |

Table S2. Meristic characters of clear *Gobius niger* individuals from the Mediterranean Sea. N: number; m: mean; M: mode; S: standard deviation; Sm: standard error of the mean

| Meristic characters          | N  | Extremes | m     | M  | S    | Sm   |
|------------------------------|----|----------|-------|----|------|------|
| Rays on the first dorsal fin | 30 | 6        | 6     | 6  | 0    | 0    |
| Rays on the 2nd dorsal fin   | 30 | 13-14    | 13.7  | 14 | 0.45 | 0.08 |
| Rays at the anal fin         | 30 | 12-13    | 12.46 | 12 | 0.49 | 0.09 |
| Rays on the pectoral fin     | 30 | 15-17    | 16.43 | 17 | 0.66 | 0.12 |
| Rays at the ventral fin      | 30 | 9-11     | 9.53  | 9  | 0.61 | 0.11 |

Table S3. Meristic characters of dark *Gobius niger* individuals from the Mediterranean Sea. N: number; m: mean; M: mode; S: standard deviation; Sm: standard error of the mean.

| Meristic characters          | N  | Extremes | m     | M  | S    | Sm   |
|------------------------------|----|----------|-------|----|------|------|
| Rays on the first dorsal fin | 30 | 6        | 6     | 6  | 0    | 0    |
| Rays on the 2nd dorsal fin   | 30 | 13-14    | 13.83 | 14 | 0.37 | 0.06 |
| Rays at the anal fin         | 30 | 11-13    | 12.43 | 12 | 0.55 | 0.10 |
| Rays on the pectoral fin     | 30 | 16-18    | 16.93 | 17 | 0.62 | 0.11 |
| Rays at the ventral fin      | 30 | 9-11     | 10.13 | 10 | 0.56 | 0.10 |

Table S4. Meristic characters of clear *Gobius niger* individuals from Marchica lagoon. N: number; m: mean; M: mode; S: standard deviation; Sm: standard error of the mean.

| Meristic characters          | N  | Extremes | m     | M  | S    | Sm   |
|------------------------------|----|----------|-------|----|------|------|
| Rays on the first dorsal fin | 30 | 6        | 6     | 6  | 0    | 0    |
| Rays on the 2nd dorsal fin   | 30 | 13-14    | 13,48 | 13 | 0,49 | 0,10 |
| Rays at the anal fin         | 30 | 12-13    | 12,4  | 12 | 0,48 | 0,10 |
| Rays on the pectoral fin     | 30 | 16-18    | 16,32 | 16 | 0,54 | 0,11 |
| Rays at the ventral fin      | 30 | 9-10     | 9,12  | 9  | 0,32 | 0,06 |

Table S5. Meristic characters of dark *Gobius niger* individuals from Marchica lagoon. N: number; m: mean; M: mode; S: standard deviation; Sm: standard error of the mean.

| Meristic characters          | N  | Extremes | m     | M  | S    | Sm   |
|------------------------------|----|----------|-------|----|------|------|
| Rays on the first dorsal fin | 30 | 6        | 6     | 6  | 0    | 0    |
| Rays on the 2nd dorsal fin   | 30 | 13-14    | 13,73 | 14 | 0,44 | 0,08 |
| Rays at the anal fin         | 30 | 12-13    | 12,66 | 13 | 0,47 | 0,08 |
| Rays on the pectoral fin     | 30 | 15-17    | 16,16 | 16 | 0,46 | 0,08 |
| Rays at the ventral fin      | 30 | 9-10     | 9,10  | 9  | 0,30 | 0,05 |

Table S6. Allometric relationships between various numerical characters measured in clear *Gobius niger* from the adjacent Moroccan Mediterranean Sea. SL: standard length; TL: total length; HL: head length; BH: body height; ED: eye diameter, N: number; r: correlation coefficient.

| Allometry equations<br><b>Log y = a Log x + Log b</b> | y (cm) | Extremes y (cm) | x (cm) | Extremes x (cm) | N  | R    | p-value |
|-------------------------------------------------------|--------|-----------------|--------|-----------------|----|------|---------|
| Log TL = 1,2571 Log SL - 0,4726                       | 12,27  | 9-15            | 10,13  | 8-12,5          | 30 | 0,97 | <0,05   |
| Log HL = 0,266 Log SL +0,1199                         | 2,811  | 2,3-3,5         | 10,13  | 8-12,5          | 30 | 0,85 | <0,05   |
| Log BH = 0,1249 Log SL +1,134                         | 2,40   | 1,5-3           | 10,13  | 8-12,5          | 30 | 0,41 | <0,05   |
| Log ED = 0,0895 Log HL +0,1312                        | 0,38   | 0,3-0,5         | 2,81   | 2,5-3,5         | 30 | 0,50 | <0,05   |
| Log SnL = 0,3621 Log HL -0,0933                       | 0,92   | 0,6-1,3         | 2,81   | 2,5-3,5         | 30 | 0,64 | <0,05   |

Table S7. Allometric relationships between various numerical characters measured in dark *Gobius niger* from the adjacent Moroccan Mediterranean Sea. SL: standard length; TL: total length; HL: head length; BH: body height; ED: eye diameter, N: number; r: correlation coefficient.

| Allometry equations<br><b>Log y = a Log x + Log b</b> | y (cm) | Extremes y (cm) | x (cm) | Extremes x (cm) | N  | R    | p-value |
|-------------------------------------------------------|--------|-----------------|--------|-----------------|----|------|---------|
| Log TL = 1,0462 Log SL + 2,0031                       | 14.24  | 12.5-16         | 11,7   | 10,5-13,5       | 30 | 0,89 | <0,05   |
| Log HL = 0,2838 Log SL +0,0364                        | 3.35   | 2,8-4           | 11,7   | 10,5-13,5       | 30 | 0,71 | <0,05   |
| Log BH = 0,6438 Log SL +0,17                          | 2,60   | 2,2-3,1         | 11,7   | 10,5-13,5       | 30 | 0,64 | <0,05   |
| Log ED = 0,0316 Log HL +0,3306                        | 0,43   | 0,4-0,5         | 3,35   | 2,8-4           | 30 | 0,36 | <0,05   |
| Log SnL = 0,3223 Log HL +0,2585                       | 1,19   | 1-1,5           | 3,35   | 2,8-4           | 30 | 0,59 | <0,05   |

Table S8. Allometric relationships between various numerical characters measured in clear *Gobius niger* from Marchica lagoon. SL: standard length; TL: total length; HL: head length; BH: body height; ED: eye diameter, N: number; r: correlation coefficient.

| Allometry equations<br><b>Log y = a Log x + Log b</b> | y (cm) | Extremes y (cm) | x (cm) | Extremes x (cm) | N  | R    | p-value |
|-------------------------------------------------------|--------|-----------------|--------|-----------------|----|------|---------|
| Log TL = 1.2799 Log SL -0.5042                        | 9.97   | 6.3-13          | 8.18   | 5.4-10.2        | 30 | 0.99 | <0.05   |
| Log HL = -0.1034 Log SL +0.2838                       | 2.22   | 1.5-2.8         | 8.18   | 5.4-10.2        | 30 | 0.96 | <0.05   |
| Log BH = 0.2469 Log SL -0.3854                        | 1.63   | 0.8-2.3         | 8.18   | 5.4-10.2        | 30 | 0.87 | <0.05   |
| Log ED = 0.0449 Log HL +0.2323                        | 0.33   | 0.3-0.4         | 2.22   | 1.5-2.8         | 30 | 0.40 | <0.05   |
| Log SnL = 0.3407 Log HL +0.0396                       | 0.79   | 0.5-1.2         | 2.22   | 1.5-2.8         | 30 | 0.97 | <0.05   |

Table S9. Allometric relationships between various numerical characters measured in dark *Gobius niger* from Marchica lagoon. SL: standard length; TL: total length; HL: head length; BH: body height; ED: eye diameter. N: number; r: correlation coefficient.

| Allometry equations            | y (cm) | Extremes y (cm) | x (cm) | Extremes x (cm) | N  | R    | p-value |
|--------------------------------|--------|-----------------|--------|-----------------|----|------|---------|
| <b>Log y = a Log x + Log b</b> |        |                 |        |                 |    |      |         |
| Log TL = 1.2178 Log SL+ 0.1024 | 10.86  | 7.3-13          | 8.83   | 6-10.5          | 30 | 0.98 | <0.05   |
| Log HL = 0.3188 Log SL -0.4324 | 2.38   | 1.5-3           | 8.83   | 6-10.5          | 30 | 0.85 | <0.05   |
| Log BH = 0.2445 Log SL -0.3695 | 1.79   | 1.1-2.4         | 8.83   | 6-10.5          | 30 | 0.79 | <0.05   |
| Log ED = 0.0426 Log HL +0.2251 | 0.32   | 0.3-0.4         | 2.38   | 1.5-3           | 30 | 0.36 | <0.05   |
| Log SnL= 0.3034 Log HL +0.227  | 0.95   | 0.5-1.2         | 2.38   | 1.5-3           | 30 | 0.80 | <0.05   |

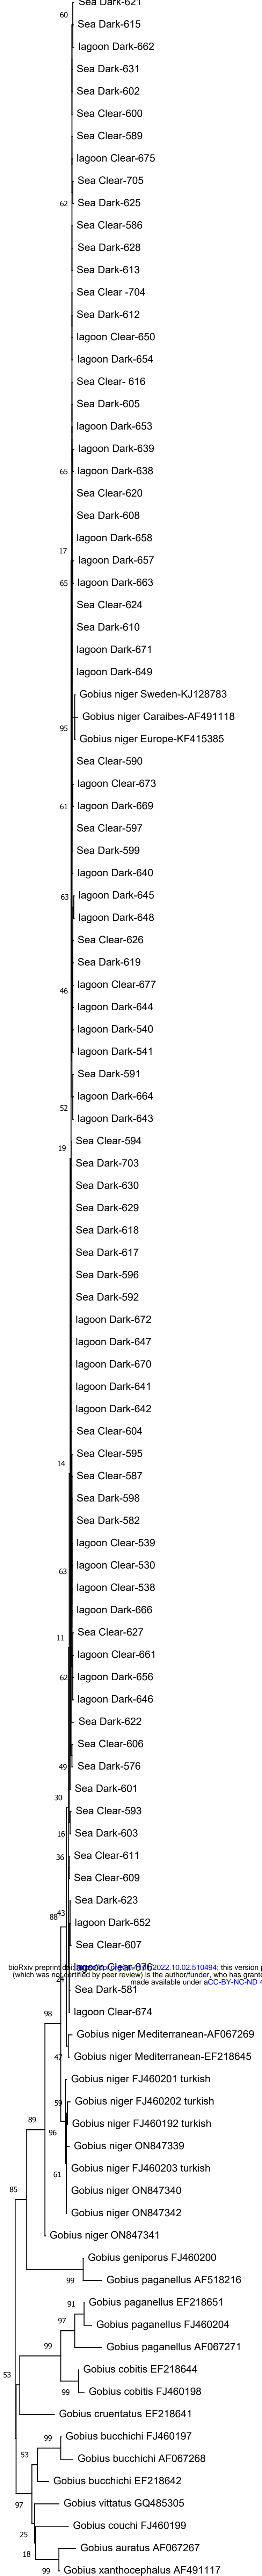

bioRxiv preprint doi: <https://doi.org/10.1101/2022.10.02.510494>; this version posted October 3, 2022. The copyright holder for this preprint (which was not certified by peer review) is the author/funder, who has granted bioRxiv a license to display the preprint in perpetuity. It is made available under aCC-BY-NC-ND 4.0 International license.

0.02

Figure S1. Phylogenetic tree including all the species of Gobius that are represented on GenBank by a targeted a fragment of the 16S rRNA gene.

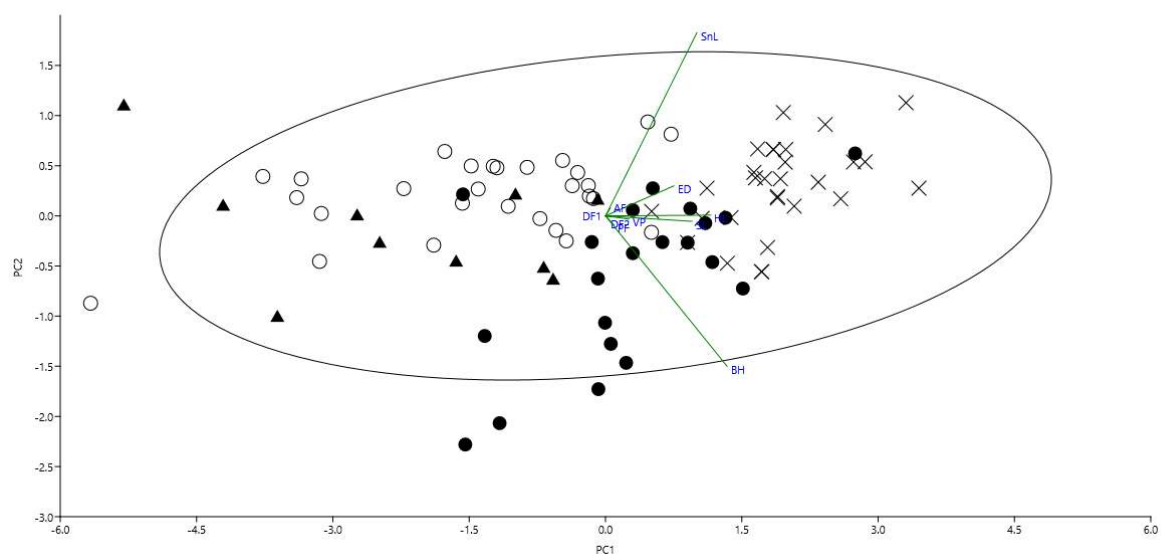

Figure S2. Principal Component Analysis of morphological variables of the *Gobius niger* (standard length, SL ; body height, BH; head length, HL; snout length, SnL; eye diameter, ED; first dorsal fin, DF1; second dorsal fin, DF2; anal fin, AF; pectoral fin, PF and ventral fin, VF) with projection of phenotypic groups.
